# Supplementary material for: Evaluation of the cooling efficacy of different equine leg cooling methods
Source: Atypon-hosted journal article supplement (doi:10.3920/cep180052), 2019-04-09
Supplement: cep180052_esm.pdf [file cep180052_esm.pdf]

**Evaluation of the cooling efficacy of different equine leg cooling methods**

*D.J. Marlin*

**Table S1. Results of one-way ANOVA for starting and end internal and external temperatures (°C) and total heat removed in 30 min (kJ).**

|                                                      | Sum of squares | Degrees of freedom | Mean square | F ratio | P-value  |
|------------------------------------------------------|----------------|--------------------|-------------|---------|----------|
| External temperature start (°C, 0 min)               |                |                    |             |         |          |
| Between                                              | 3.2            | 14                 | 0.2         | 1.9     | 0.07490  |
| Within                                               | 3.7            | 30                 | 0.1         |         |          |
| Total                                                | 6.9            | 44                 |             |         |          |
| External temperature end (°C, 30 min)                |                |                    |             |         |          |
| Between                                              | 3091.1         | 14                 | 220.8       | 160.5   | <0.00001 |
| Within                                               | 41.3           | 30                 | 1.4         |         |          |
| Total                                                | 3132.4         | 44                 |             |         |          |
| Change in external temperature (°C, 0-30min)         |                |                    |             |         |          |
| Between                                              | 3066.4         | 14                 | 219.0       | 132.1   | <0.00001 |
| Within                                               | 49.7           | 30                 | 1.7         |         |          |
| Total                                                | 3116.1         | 44                 |             |         |          |
| External temperature cooling rate (°C/min, 0-30 min) |                |                    |             |         |          |
| Between Groups                                       | 5.8            | 14                 | 0.4         | 227.1   | <0.00001 |
| Within Groups                                        | 0.1            | 30                 | 0.0         |         |          |
| Total                                                | 5.8            | 44                 |             |         |          |
| Internal temperature start (°C, 0 min)               |                |                    |             |         |          |
| Between                                              | 19.1           | 14                 | 1.4         | 755.9   | <0.00001 |
| Within                                               | 0.1            | 30                 | 0.0         |         |          |
| Total                                                | 19.1           | 44                 |             |         |          |
| Internal temperature end (°C, 30 min)                |                |                    |             |         |          |
| Between                                              | 2803.7         | 14                 | 200.3       | 300.7   | <0.00001 |
| Within                                               | 20.0           | 30                 | 0.7         |         |          |
| Total                                                | 2823.7         | 44                 |             |         |          |
| Change in internal temperature (°C, 0-30min)         |                |                    |             |         |          |
| Between                                              | 2803.0         | 14                 | 200.2       | 425.4   | <0.00001 |
| Within                                               | 14.1           | 30                 | 0.5         |         |          |
| Total                                                | 2817.1         | 44                 |             |         |          |
| Internal temperature cooling rate (°C/min, 0-30 min) |                |                    |             |         |          |
| Between Groups                                       | 5.7            | 14                 | 0.4         | 669.7   | <0.00001 |
| Within Groups                                        | 0.0            | 30                 | 0.0         |         |          |
| Total                                                | 5.7            | 44                 |             |         |          |
| Heat removed in 30 min (kJ) (Internal)               |                |                    |             |         |          |
| Between Groups                                       | 72340.5        | 14                 | 5167.2      | 1510.9  | <0.00001 |
| Within Groups                                        | 102.6          | 30                 | 3.4         |         |          |
| Total                                                | 72443.1        | 44                 |             |         |          |

**Table S2. Results of Tukey mean comparisons between different cooling methods.**

| <b>EXTERNAL TEMPERATURE START (°C, 0 min)</b> | <b>Difference</b> | <b>Lower</b> | <b>Upper</b> | <b>P-value</b> |
|-----------------------------------------------|-------------------|--------------|--------------|----------------|
| Aerochill 16 °C vs Clay Covered 15 °C         | 0.25              | -0.81        | 1.31         | 0.99984        |
| Aerochill 16 °C vs Clay Uncovered 15 °C       | 0.40              | -0.66        | 1.46         | 0.98151        |
| Aerochill 16 °C vs Cryochaps Front 24h        | 0.03              | -1.02        | 1.09         | 1.00000        |
| Aerochill 16 °C vs Flask Only                 | 0.20              | -0.86        | 1.26         | 0.99999        |
| Aerochill 16 °C vs Flask Only + Bandage       | 0.40              | -0.66        | 1.46         | 0.98151        |
| Aerochill 16 °C vs Green Ice Gel 15 °C        | 0.37              | -0.69        | 1.42         | 0.99140        |
| Aerochill 16 °C vs Hosing 15 °C               | 0.20              | -0.86        | 1.26         | 0.99999        |
| Aerochill 16 °C vs Hypacool                   | 0.01              | -1.04        | 1.07         | 1.00000        |
| Aerochill 16 °C vs Ice + Water 0 °C           | 0.53              | -0.52        | 1.59         | 0.85423        |
| Aerochill 16 °C vs Ice Cubes in a Boot        | 0.17              | -0.89        | 1.22         | 1.00000        |
| Aerochill 16 °C vs Ice Horse 24h              | 0.27              | -0.79        | 1.32         | 0.99966        |
| Aerochill 16 °C vs Ice Vibe 24h +Vibe         | 0.13              | -0.92        | 1.19         | 1.00000        |
| Aerochill 16 °C vs Ice Vibe 24h -Vibe         | 0.27              | -0.79        | 1.32         | 0.99966        |
| Aerochill 16 °C vs Premier Water 15 °C        | 0.05              | -1.01        | 1.11         | 1.00000        |
| Clay Covered 15 °C vs Clay Uncovered 15 °C    | 0.15              | -0.91        | 1.21         | 1.00000        |
| Clay Covered 15 °C vs Cryochaps Front 24h     | 0.28              | -0.77        | 1.34         | 0.99935        |
| Clay Covered 15 °C vs Flask Only              | 0.45              | -0.61        | 1.51         | 0.95285        |
| Clay Covered 15 °C vs Flask Only + Bandage    | 0.65              | -0.41        | 1.71         | 0.61953        |
| Clay Covered 15 °C vs Green Ice Gel 15 °C     | 0.62              | -0.44        | 1.67         | 0.69389        |
| Clay Covered 15 °C vs Hosing 15 °C            | 0.05              | -1.01        | 1.11         | 1.00000        |
| Clay Covered 15 °C vs Hypacool                | 0.24              | -0.82        | 1.29         | 0.99991        |
| Clay Covered 15 °C vs Ice + Water 0 °C        | 0.78              | -0.27        | 1.84         | 0.33390        |
| Clay Covered 15 °C vs Ice Cubes in a Boot     | 0.42              | -0.64        | 1.47         | 0.97408        |
| Clay Covered 15 °C vs Ice Horse 24h           | 0.02              | -1.04        | 1.07         | 1.00000        |
| Clay Covered 15 °C vs Ice Vibe 24h +Vibe      | 0.12              | -0.94        | 1.17         | 1.00000        |
| Clay Covered 15 °C vs Ice Vibe 24h -Vibe      | 0.02              | -1.04        | 1.07         | 1.00000        |
| Clay Covered 15 °C vs Premier Water 15 °C     | 0.20              | -0.86        | 1.26         | 0.99999        |
| Clay Uncovered 15 °C vs Cryochaps Front 24h   | 0.43              | -0.62        | 1.49         | 0.96461        |
| Clay Uncovered 15 °C vs Flask Only            | 0.60              | -0.46        | 1.66         | 0.72959        |
| Clay Uncovered 15 °C vs Flask Only + Bandage  | 0.80              | -0.26        | 1.86         | 0.30389        |
| Clay Uncovered 15 °C vs Green Ice Gel 15 °C   | 0.77              | -0.29        | 1.82         | 0.36560        |
| Clay Uncovered 15 °C vs Hosing 15 °C          | 0.20              | -0.86        | 1.26         | 0.99999        |
| Clay Uncovered 15 °C vs Hypacool              | 0.39              | -0.67        | 1.44         | 0.98618        |
| Clay Uncovered 15 °C vs Ice + Water 0 °C      | 0.93              | -0.12        | 1.99         | 0.12799        |
| Clay Uncovered 15 °C vs Ice Cubes in a Boot   | 0.57              | -0.49        | 1.62         | 0.79618        |
| Clay Uncovered 15 °C vs Ice Horse 24h         | 0.13              | -0.92        | 1.19         | 1.00000        |
| Clay Uncovered 15 °C vs Ice Vibe 24h +Vibe    | 0.27              | -0.79        | 1.32         | 0.99966        |
| Clay Uncovered 15 °C vs Ice Vibe 24h -Vibe    | 0.13              | -0.92        | 1.19         | 1.00000        |
| Clay Uncovered 15 °C vs Premier Water 15 °C   | 0.35              | -0.71        | 1.41         | 0.99442        |
| Cryochaps Front 24h vs Flask Only             | 0.17              | -0.89        | 1.22         | 1.00000        |
| Cryochaps Front 24h vs Flask Only + Bandage   | 0.37              | -0.69        | 1.42         | 0.99140        |
| Cryochaps Front 24h vs Green Ice Gel 15 °C    | 0.33              | -0.72        | 1.39         | 0.99651        |
| Cryochaps Front 24h vs Hosing 15 °C           | 0.23              | -0.82        | 1.29         | 0.99993        |
| Cryochaps Front 24h vs Hypacool               | 0.05              | -1.01        | 1.10         | 1.00000        |
| Cryochaps Front 24h vs Ice + Water 0 °C       | 0.50              | -0.56        | 1.56         | 0.90194        |
| Cryochaps Front 24h vs Ice Cubes in a Boot    | 0.13              | -0.92        | 1.19         | 1.00000        |
| Cryochaps Front 24h vs Ice Horse 24h          | 0.30              | -0.76        | 1.36         | 0.99880        |
| Cryochaps Front 24h vs Ice Vibe 24h +Vibe     | 0.17              | -0.89        | 1.22         | 1.00000        |
| Cryochaps Front 24h vs Ice Vibe 24h -Vibe     | 0.30              | -0.76        | 1.36         | 0.99880        |
| Cryochaps Front 24h vs Premier Water 15 °C    | 0.08              | -0.97        | 1.14         | 1.00000        |
| Flask Only vs Flask Only + Bandage            | 0.20              | -0.86        | 1.26         | 0.99999        |

| <b>EXTERNAL TEMPERATURE START (°C, 0 min)</b> | <b>Difference</b> | <b>Lower</b> | <b>Upper</b> | <b>P-value</b> |
|-----------------------------------------------|-------------------|--------------|--------------|----------------|
| Flask Only vs Green Ice Gel 15 °C             | 0.17              | -0.89        | 1.22         | 1.00000        |
| Flask Only vs Hosing 15 °C                    | 0.40              | -0.66        | 1.46         | 0.98151        |
| Flask Only vs Hypacool                        | 0.21              | -0.84        | 1.27         | 0.99997        |
| Flask Only vs Ice + Water 0 °C                | 0.33              | -0.72        | 1.39         | 0.99651        |
| Flask Only vs Ice Cubes in a Boot             | 0.03              | -1.02        | 1.09         | 1.00000        |
| Flask Only vs Ice Horse 24h                   | 0.47              | -0.59        | 1.52         | 0.93858        |
| Flask Only vs Ice Vibe 24h +Vibe              | 0.33              | -0.72        | 1.39         | 0.99651        |
| Flask Only vs Ice Vibe 24h -Vibe              | 0.47              | -0.59        | 1.52         | 0.93858        |
| Flask Only vs Premier Water 15 °C             | 0.25              | -0.81        | 1.31         | 0.99984        |
| Flask Only + Bandage vs Green Ice Gel 15 °C   | 0.03              | -1.02        | 1.09         | 1.00000        |
| Flask Only + Bandage vs Hosing 15 °C          | 0.60              | -0.46        | 1.66         | 0.72959        |
| Flask Only + Bandage vs Hypacool              | 0.41              | -0.64        | 1.47         | 0.97572        |
| Flask Only + Bandage vs Ice + Water 0 °C      | 0.13              | -0.92        | 1.19         | 1.00000        |
| Flask Only + Bandage vs Ice Cubes in a Boot   | 0.23              | -0.82        | 1.29         | 0.99993        |
| Flask Only + Bandage vs Ice Horse 24h         | 0.67              | -0.39        | 1.72         | 0.58163        |
| Flask Only + Bandage vs Ice Vibe 24h +Vibe    | 0.53              | -0.52        | 1.59         | 0.85423        |
| Flask Only + Bandage vs Ice Vibe 24h -Vibe    | 0.67              | -0.39        | 1.72         | 0.58163        |
| Flask Only + Bandage vs Premier Water 15 °C   | 0.45              | -0.61        | 1.51         | 0.95285        |
| Green Ice Gel 15 °C vs Hosing 15 °C           | 0.57              | -0.49        | 1.62         | 0.79618        |
| Green Ice Gel 15 °C vs Hypacool               | 0.38              | -0.68        | 1.44         | 0.98814        |
| Green Ice Gel 15 °C vs Ice + Water 0 °C       | 0.17              | -0.89        | 1.22         | 1.00000        |
| Green Ice Gel 15 °C vs Ice Cubes in a Boot    | 0.20              | -0.86        | 1.26         | 0.99999        |
| Green Ice Gel 15 °C vs Ice Horse 24h          | 0.63              | -0.42        | 1.69         | 0.65708        |
| Green Ice Gel 15 °C vs Ice Vibe 24h +Vibe     | 0.50              | -0.56        | 1.56         | 0.90194        |
| Green Ice Gel 15 °C vs Ice Vibe 24h -Vibe     | 0.63              | -0.42        | 1.69         | 0.65708        |
| Green Ice Gel 15 °C vs Premier Water 15 °C    | 0.42              | -0.64        | 1.47         | 0.97408        |
| Hosing 15 °C vs Hypacool                      | 0.19              | -0.87        | 1.24         | 1.00000        |
| Hosing 15 °C vs Ice + Water 0 °C              | 0.73              | -0.32        | 1.79         | 0.43353        |
| Hosing 15 °C vs Ice Cubes in a Boot           | 0.37              | -0.69        | 1.42         | 0.99140        |
| Hosing 15 °C vs Ice Horse 24h                 | 0.07              | -0.99        | 1.12         | 1.00000        |
| Hosing 15 °C vs Ice Vibe 24h +Vibe            | 0.07              | -0.99        | 1.12         | 1.00000        |
| Hosing 15 °C vs Ice Vibe 24h -Vibe            | 0.07              | -0.99        | 1.12         | 1.00000        |
| Hosing 15 °C vs Premier Water 15 °C           | 0.15              | -0.91        | 1.21         | 1.00000        |
| Hypacool vs Ice + Water 0 °C                  | 0.55              | -0.51        | 1.60         | 0.83217        |
| Hypacool vs Ice Cubes in a Boot               | 0.18              | -0.88        | 1.24         | 1.00000        |
| Hypacool vs Ice Horse 24h                     | 0.25              | -0.80        | 1.31         | 0.99981        |
| Hypacool vs Ice Vibe 24h +Vibe                | 0.12              | -0.94        | 1.18         | 1.00000        |
| Hypacool vs Ice Vibe 24h -Vibe                | 0.25              | -0.80        | 1.31         | 0.99981        |
| Hypacool vs Premier Water 15 °C               | 0.04              | -1.02        | 1.09         | 1.00000        |
| Ice + Water 0 °C vs Ice Cubes in a Boot       | 0.37              | -0.69        | 1.42         | 0.99140        |
| Ice + Water 0 °C vs Ice Horse 24h             | 0.80              | -0.26        | 1.86         | 0.30389        |
| Ice + Water 0 °C vs Ice Vibe 24h +Vibe        | 0.67              | -0.39        | 1.72         | 0.58163        |
| Ice + Water 0 °C vs Ice Vibe 24h -Vibe        | 0.80              | -0.26        | 1.86         | 0.30389        |
| Ice + Water,0 °C vs Premier Water 15 °C       | 0.58              | -0.47        | 1.64         | 0.76380        |
| Ice Cubes in a Boot vs Ice Horse 24h          | 0.43              | -0.62        | 1.49         | 0.96461        |
| Ice Cubes in a Boot vs Ice Vibe 24h +Vibe     | 0.30              | -0.76        | 1.36         | 0.99880        |
| Ice Cubes in a Boot vs Ice Vibe 24h -Vibe     | 0.43              | -0.62        | 1.49         | 0.96461        |
| Ice Cubes in a Boot vs Premier Water 15 °C    | 0.22              | -0.84        | 1.27         | 0.99997        |
| Ice Horse,24h vs Ice Vibe 24h +Vibe           | 0.13              | -0.92        | 1.19         | 1.00000        |
| Ice, Horse,24h vs Ice Vibe 24h -Vibe          | 0.00              | -1.06        | 1.06         | 1.00000        |
| Ice Horse,24h vs Premier Water 15 °C          | 0.22              | -0.84        | 1.27         | 0.99997        |
| Ice Vibe 24h +Vibe vs Ice Vibe 24h -Vibe      | 0.13              | -0.92        | 1.19         | 1.00000        |

| <b>EXTERNAL TEMPERATURE START (°C, 0 min)</b> | <b>Difference</b> | <b>Lower</b> | <b>Upper</b> | <b>P-value</b> |
|-----------------------------------------------|-------------------|--------------|--------------|----------------|
| Ice Vibe 24h +Vibe vs Premier Water 15 °C     | 0.08              | -0.97        | 1.14         | 1.00000        |
| Ice Vibe 24h -Vibe vs Premier Water 15 °C     | 0.22              | -0.84        | 1.27         | 0.99997        |

| <b>EXTERNAL TEMPERATURE END (°C, 30 min)</b> | <b>Difference</b> | <b>Lower</b> | <b>Upper</b> | <b>P-value</b> |
|----------------------------------------------|-------------------|--------------|--------------|----------------|
| Aerochill 16 °C vs Clay Covered 15 °C        | 2.5               | -1.0         | 6.0          | 0.41191        |
| Aerochill 16 °C vs Clay Uncovered 15 °C      | 2.6               | -0.9         | 6.1          | 0.34275        |
| Aerochill 16 °C vs Cryochaps Front 24h       | 10.2              | 6.7          | 13.8         | 0.00000        |
| Aerochill 16 °C vs Flask Only                | 3.1               | -0.4         | 6.7          | 0.12352        |
| Aerochill 16 °C vs Flask Only + Bandage      | 2.9               | -0.6         | 6.5          | 0.18685        |
| Aerochill 16 °C vs Green Ice Gel 15 °C       | 2.9               | -0.6         | 6.5          | 0.18685        |
| Aerochill 16 °C vs Hosing 15 °C              | 12.3              | 8.8          | 15.9         | 0.00000        |
| Aerochill 16 °C vs Hypacool                  | 1.1               | -2.4         | 4.6          | 0.99690        |
| Aerochill 16 °C vs Ice + Water 0 °C          | 27.1              | 23.6         | 30.7         | 0.00000        |
| Aerochill 16 °C vs Ice Cubes in a Boot       | 11.0              | 7.5          | 14.5         | 0.00000        |
| Aerochill 16 °C vs Ice Horse 24h             | 16.8              | 13.3         | 20.4         | 0.00000        |
| Aerochill 16 °C vs Ice Vibe 24h +Vibe        | 5.9               | 2.3          | 9.4          | 0.00008        |
| Aerochill 16 °C vs Ice Vibe 24h -Vibe        | 9.0               | 5.4          | 12.5         | 0.00000        |
| Aerochill 16 °C vs Premier Water 15 °C       | 0.3               | -3.2         | 3.9          | 1.00000        |
| Clay Covered 15 °C vs Clay Uncovered 15 °C   | 5.1               | 1.6          | 8.6          | 0.00078        |
| Clay Covered 15 °C vs Cryochaps Front 24h    | 12.7              | 9.2          | 16.2         | 0.00000        |
| Clay Covered 15 °C vs Flask Only             | 0.7               | -2.9         | 4.2          | 0.99999        |
| Clay Covered 15 °C vs Flask Only + Bandage   | 0.5               | -3.1         | 4.0          | 1.00000        |
| Clay Covered 15 °C vs Green Ice Gel 15 °C    | 5.4               | 1.9          | 8.9          | 0.00030        |
| Clay Covered 15 °C vs Hosing 15 °C           | 14.8              | 11.3         | 18.3         | 0.00000        |
| Clay Covered 15 °C vs Hypacool               | 1.4               | -2.1         | 4.9          | 0.97527        |
| Clay Covered 15 °C vs Ice + Water 0 °C       | 29.6              | 26.1         | 33.1         | 0.00000        |
| Clay Covered 15 °C vs Ice Cubes in a Boot    | 13.5              | 10.0         | 17.0         | 0.00000        |
| Clay Covered 15 °C vs Ice Horse 24h          | 19.3              | 15.8         | 22.8         | 0.00000        |
| Clay Covered 15 °C vs Ice Vibe 24h +Vibe     | 8.4               | 4.8          | 11.9         | 0.00000        |
| Clay Covered 15 °C vs Ice Vibe 24h -Vibe     | 11.5              | 7.9          | 15.0         | 0.00000        |
| Clay Covered 15 °C vs Premier Water 15 °C    | 2.8               | -0.7         | 6.3          | 0.23402        |
| Clay Uncovered 15 °C vs Cryochaps Front 24h  | 7.6               | 4.1          | 11.2         | 0.00000        |
| Clay Uncovered 15 °C vs Flask Only           | 5.7               | 2.2          | 9.3          | 0.00012        |
| Clay Uncovered 15 °C vs Flask Only + Bandage | 5.5               | 2.0          | 9.1          | 0.00022        |
| Clay Uncovered 15 °C vs Green Ice Gel 15 °C  | 0.3               | -3.2         | 3.9          | 1.00000        |
| Clay Uncovered 15 °C vs Hosing 15 °C         | 9.7               | 6.2          | 13.3         | 0.00000        |
| Clay Uncovered 15 °C vs Hypacool             | 3.7               | 0.2          | 7.2          | 0.03282        |
| Clay Uncovered 15 °C vs Ice + Water 0 °C     | 24.5              | 21.0         | 28.1         | 0.00000        |
| Clay Uncovered 15 °C vs Ice Cubes in a Boot  | 8.4               | 4.9          | 11.9         | 0.00000        |
| Clay Uncovered 15 °C vs Ice Horse 24h        | 14.2              | 10.7         | 17.8         | 0.00000        |
| Clay Uncovered 15 °C vs Ice Vibe 24h +Vibe   | 3.3               | -0.3         | 6.8          | 0.09210        |
| Clay Uncovered 15 °C vs Ice Vibe 24h -Vibe   | 6.4               | 2.8          | 9.9          | 0.00002        |
| Clay Uncovered 15 °C vs Premier Water 15 °C  | 2.3               | -1.3         | 5.8          | 0.55410        |
| Cryochaps Front 24h vs Flask Only            | 13.4              | 9.8          | 16.9         | 0.00000        |
| Cryochaps Front 24h vs Flask Only + Bandage  | 13.2              | 9.6          | 16.7         | 0.00000        |
| Cryochaps Front 24h vs Green Ice Gel 15 °C   | 7.3               | 3.8          | 10.8         | 0.00000        |
| Cryochaps Front 24h vs Hosing 15 °C          | 2.1               | -1.4         | 5.6          | 0.66704        |
| Cryochaps Front 24h vs Hypacool              | 11.3              | 7.8          | 14.9         | 0.00000        |
| Cryochaps Front 24h vs Ice + Water 0 °C      | 16.9              | 13.4         | 20.4         | 0.00000        |
| Cryochaps Front 24h vs Ice Cubes in a Boot   | 0.8               | -2.8         | 4.3          | 0.99994        |
| Cryochaps Front 24h vs Ice Horse 24h         | 6.6               | 3.1          | 10.1         | 0.00001        |
| Cryochaps Front 24h vs Ice Vibe 24h +Vibe    | 4.4               | 0.8          | 7.9          | 0.00571        |

| <b>EXTERNAL TEMPERATURE END (°C, 30 min)</b> | <b>Difference</b> | <b>Lower</b> | <b>Upper</b> | <b>P-value</b> |
|----------------------------------------------|-------------------|--------------|--------------|----------------|
| Cryochaps Front 24h vs Ice Vibe 24h -Vibe    | 1.3               | -2.3         | 4.8          | 0.98832        |
| Cryochaps Front 24h vs Premier Water 15 °C   | 9.9               | 6.4          | 13.4         | 0.00000        |
| Flask Only vs Flask Only + Bandage           | 0.2               | -3.3         | 3.7          | 1.00000        |
| Flask Only vs Green Ice Gel 15 °C            | 6.1               | 2.5          | 9.6          | 0.00005        |
| Flask Only vs Hosing 15 °C                   | 15.5              | 11.9         | 19.0         | 0.00000        |
| Flask Only vs Hypacool                       | 2.0               | -1.5         | 5.6          | 0.71069        |
| Flask Only vs Ice + Water 0 °C               | 30.3              | 26.7         | 33.8         | 0.00000        |
| Flask Only vs Ice Cubes in a Boot            | 14.1              | 10.6         | 17.7         | 0.00000        |
| Flask Only vs Ice Horse 24h                  | 20.0              | 16.4         | 23.5         | 0.00000        |
| Flask Only vs Ice Vibe 24h +Vibe             | 9.0               | 5.5          | 12.5         | 0.00000        |
| Flask Only vs Ice Vibe 24h -Vibe             | 12.1              | 8.6          | 15.6         | 0.00000        |
| Flask Only vs Premier Water 15 °C            | 3.5               | -0.1         | 7.0          | 0.05798        |
| Flask Only + Bandage vs Green Ice Gel 15 °C  | 5.9               | 2.3          | 9.4          | 0.00008        |
| Flask Only + Bandage vs Hosing 15 °C         | 15.3              | 11.7         | 18.8         | 0.00000        |
| Flask Only + Bandage vs Hypacool             | 1.8               | -1.7         | 5.4          | 0.82814        |
| Flask Only + Bandage vs Ice + Water 0 °C     | 30.1              | 26.5         | 33.6         | 0.00000        |
| Flask Only + Bandage vs Ice Cubes in a Boot  | 13.9              | 10.4         | 17.5         | 0.00000        |
| Flask Only + Bandage vs Ice Horse 24h        | 19.8              | 16.2         | 23.3         | 0.00000        |
| Flask Only + Bandage vs Ice Vibe 24h +Vibe   | 8.8               | 5.3          | 12.3         | 0.00000        |
| Flask Only + Bandage vs Ice Vibe 24h -Vibe   | 11.9              | 8.4          | 15.4         | 0.00000        |
| Flask Only + Bandage vs Premier Water 15 °C  | 3.3               | -0.3         | 6.8          | 0.09210        |
| Green Ice Gel 15 °C vs Hosing 15 °C          | 9.4               | 5.9          | 12.9         | 0.00000        |
| Green Ice Gel 15 °C vs Hypacool              | 4.0               | 0.5          | 7.6          | 0.01395        |
| Green Ice Gel 15 °C vs Ice + Water 0 °C      | 24.2              | 20.7         | 27.7         | 0.00000        |
| Green Ice Gel 15 °C vs Ice Cubes in a Boot   | 8.1               | 4.5          | 11.6         | 0.00000        |
| Green Ice Gel 15 °C vs Ice Horse 24h         | 13.9              | 10.4         | 17.4         | 0.00000        |
| Green Ice Gel 15 °C vs Ice Vibe 24h +Vibe    | 2.9               | -0.6         | 6.5          | 0.18685        |
| Green Ice Gel 15 °C vs Ice Vibe 24h -Vibe    | 6.0               | 2.5          | 9.6          | 0.00005        |
| Green Ice Gel 15 °C vs Premier Water 15 °C   | 2.6               | -0.9         | 6.1          | 0.34275        |
| Hosing 15 °C vs Hypacool                     | 13.4              | 9.9          | 17.0         | 0.00000        |
| Hosing 15 °C vs Ice + Water 0 °C             | 14.8              | 11.3         | 18.3         | 0.00000        |
| Hosing 15 °C vs Ice Cubes in a Boot          | 1.3               | -2.2         | 4.9          | 0.98179        |
| Hosing 15 °C vs Ice Horse 24h                | 4.5               | 1.0          | 8.0          | 0.00396        |
| Hosing 15 °C vs Ice Vibe 24h +Vibe           | 6.5               | 2.9          | 10.0         | 0.00002        |
| Hosing 15 °C vs Ice Vibe 24h -Vibe           | 3.4               | -0.2         | 6.9          | 0.07331        |
| Hosing 15 °C vs Premier Water 15 °C          | 12.0              | 8.5          | 15.5         | 0.00000        |
| Hypacool vs Ice + Water 0 °C                 | 28.2              | 24.7         | 31.8         | 0.00000        |
| Hypacool vs Ice Cubes in a Boot              | 12.1              | 8.6          | 15.6         | 0.00000        |
| Hypacool vs Ice Horse 24h                    | 17.9              | 14.4         | 21.5         | 0.00000        |
| Hypacool vs Ice Vibe 24h +Vibe               | 7.0               | 3.4          | 10.5         | 0.00000        |
| Hypacool vs Ice Vibe 24h -Vibe               | 10.1              | 6.5          | 13.6         | 0.00000        |
| Hypacool vs Premier Water 15 °C              | 1.4               | -2.1         | 5.0          | 0.96715        |
| Ice + Water 0 °C vs Ice Cubes in a Boot      | 16.1              | 12.6         | 19.7         | 0.00000        |
| Ice + Water 0 °C vs Ice Horse 24h            | 10.3              | 6.8          | 13.8         | 0.00000        |
| Ice + Water 0 °C vs Ice Vibe 24h +Vibe       | 21.3              | 17.7         | 24.8         | 0.00000        |
| Ice + Water 0 °C vs Ice Vibe 24h -Vibe       | 18.2              | 14.6         | 21.7         | 0.00000        |
| Ice + Water 0 °C vs Premier Water 15 °C      | 26.8              | 23.3         | 30.3         | 0.00000        |
| Ice Cubes in a Boot vs Ice Horse 24h         | 5.8               | 2.3          | 9.4          | 0.00009        |
| Ice Cubes in a Boot vs Ice Vibe 24h +Vibe    | 5.1               | 1.6          | 8.7          | 0.00067        |
| Ice Cubes in a Boot vs Ice Vibe 24h -Vibe    | 2.0               | -1.5         | 5.6          | 0.71069        |
| Ice Cubes in a Boot vs Premier Water 15 °C   | 10.7              | 7.1          | 14.2         | 0.00000        |
| Ice Horse 24h vs Ice Vibe 24h +Vibe          | 11.0              | 7.4          | 14.5         | 0.00000        |

| <b>EXTERNAL TEMPERATURE END (°C, 30 min)</b> | <b>Difference</b> | <b>Lower</b> | <b>Upper</b> | <b>P-value</b> |
|----------------------------------------------|-------------------|--------------|--------------|----------------|
| Ice Horse 24h vs Ice Vibe 24h -Vibe          | 7.9               | 4.3          | 11.4         | 0.00000        |
| Ice Horse 24h vs Premier Water 15 °C         | 16.5              | 13.0         | 20.0         | 0.00000        |
| Ice Vibe 24h +Vibe vs Ice Vibe 24h -Vibe     | 3.1               | -0.4         | 6.6          | 0.13264        |
| Ice Vibe 24h +Vibe vs Premier Water 15 °C    | 5.5               | 2.0          | 9.1          | 0.00022        |
| Ice Vibe 24h -Vibe vs Premier Water 15 °C    | 8.6               | 5.1          | 12.2         | 0.00000        |

| <b>EXTERNAL TEMPERATURE DELTA (°C, 0-30 min)</b> | <b>Difference</b> | <b>Lower</b> | <b>Upper</b> | <b>P-value</b> |
|--------------------------------------------------|-------------------|--------------|--------------|----------------|
| Aerochill 16 °C vs Clay Covered 15 °C            | 2.2               | -1.6         | 6.1          | 0.71022        |
| Aerochill 16 °C vs Clay Uncovered 15 °C          | 3.0               | -0.9         | 6.9          | 0.27310        |
| Aerochill 16 °C vs Cryochaps Front 24h           | 10.2              | 6.3          | 14.1         | 0.00000        |
| Aerochill 16 °C vs Flask Only                    | 3.3               | -0.5         | 7.2          | 0.15174        |
| Aerochill 16 °C vs Flask Only + Bandage          | 3.3               | -0.5         | 7.2          | 0.15174        |
| Aerochill 16 °C vs Green Ice Gel 15 °C           | 2.6               | -1.3         | 6.4          | 0.50617        |
| Aerochill 16 °C vs Hosing 15 °C                  | 12.5              | 8.7          | 16.4         | 0.00000        |
| Aerochill 16 °C vs Hypacool                      | 1.1               | -2.8         | 5.0          | 0.99895        |
| Aerochill 16 °C vs Ice + Water 0 °C              | 26.6              | 22.7         | 30.5         | 0.00000        |
| Aerochill 16 °C vs Ice Cubes in a Boot           | 10.8              | 7.0          | 14.7         | 0.00000        |
| Aerochill 16 °C vs Ice Horse 24h                 | 17.1              | 13.2         | 21.0         | 0.00000        |
| Aerochill 16 °C vs Ice Vibe 24h +Vibe            | 6.0               | 2.1          | 9.9          | 0.00026        |
| Aerochill 16 °C vs Ice Vibe 24h -Vibe            | 9.2               | 5.4          | 13.1         | 0.00000        |
| Aerochill 16 °C vs Premier Water 15 °C           | 0.4               | -3.5         | 4.3          | 1.00000        |
| Clay Covered 15 °C vs Clay Uncovered 15 °C       | 5.2               | 1.4          | 9.1          | 0.00189        |
| Clay Covered 15 °C vs Cryochaps Front 24h        | 12.4              | 8.6          | 16.3         | 0.00000        |
| Clay Covered 15 °C vs Flask Only                 | 1.1               | -2.8         | 5.0          | 0.99880        |
| Clay Covered 15 °C vs Flask Only + Bandage       | 1.1               | -2.8         | 5.0          | 0.99880        |
| Clay Covered 15 °C vs Green Ice Gel 15 °C        | 4.8               | 0.9          | 8.7          | 0.00563        |
| Clay Covered 15 °C vs Hosing 15 °C               | 14.8              | 10.9         | 18.6         | 0.00000        |
| Clay Covered 15 °C vs Hypacool                   | 1.1               | -2.7         | 5.0          | 0.99816        |
| Clay Covered 15 °C vs Ice + Water 0 °C           | 28.8              | 25.0         | 32.7         | 0.00000        |
| Clay Covered 15 °C vs Ice Cubes in a Boot        | 13.1              | 9.2          | 16.9         | 0.00000        |
| Clay Covered 15 °C vs Ice Horse 24h              | 19.3              | 15.5         | 23.2         | 0.00000        |
| Clay Covered 15 °C vs Ice Vibe 24h +Vibe         | 8.2               | 4.4          | 12.1         | 0.00000        |
| Clay Covered 15 °C vs Ice Vibe 24h -Vibe         | 11.5              | 7.6          | 15.3         | 0.00000        |
| Clay Covered 15 °C vs Premier Water 15 °C        | 2.6               | -1.3         | 6.5          | 0.47597        |
| Clay Uncovered 15 °C vs Cryochaps Front 24h      | 7.2               | 3.3          | 11.1         | 0.00001        |
| Clay Uncovered 15 °C vs Flask Only               | 6.3               | 2.5          | 10.2         | 0.00011        |
| Clay Uncovered 15 °C vs Flask Only + Bandage     | 6.3               | 2.5          | 10.2         | 0.00011        |
| Clay Uncovered 15 °C vs Green Ice Gel 15 °C      | 0.4               | -3.4         | 4.3          | 1.00000        |
| Clay Uncovered 15 °C vs Hosing 15 °C             | 9.5               | 5.7          | 13.4         | 0.00000        |
| Clay Uncovered 15 °C vs Hypacool                 | 4.1               | 0.2          | 8.0          | 0.03106        |
| Clay Uncovered 15 °C vs Ice + Water 0 °C         | 23.6              | 19.7         | 27.5         | 0.00000        |
| Clay Uncovered 15 °C vs Ice Cubes in a Boot      | 7.8               | 4.0          | 11.7         | 0.00000        |
| Clay Uncovered 15 °C vs Ice Horse 24h            | 14.1              | 10.2         | 18.0         | 0.00000        |
| Clay Uncovered 15 °C vs Ice Vibe 24h +Vibe       | 3.0               | -0.9         | 6.9          | 0.27310        |
| Clay Uncovered 15 °C vs Ice Vibe 24h -Vibe       | 6.2               | 2.4          | 10.1         | 0.00014        |
| Clay Uncovered 15 °C vs Premier Water 15 °C      | 2.6               | -1.3         | 6.5          | 0.47597        |
| Cryochaps Front 24h vs Flask Only                | 13.5              | 9.7          | 17.4         | 0.00000        |
| Cryochaps Front 24h vs Flask Only + Bandage      | 13.5              | 9.7          | 17.4         | 0.00000        |
| Cryochaps Front 24h vs Green Ice Gel 15 °C       | 7.6               | 3.8          | 11.5         | 0.00000        |
| Cryochaps Front 24h vs Hosing 15 °C              | 2.3               | -1.5         | 6.2          | 0.65023        |
| Cryochaps Front 24h vs Hypacool                  | 11.3              | 7.4          | 15.2         | 0.00000        |
| Cryochaps Front 24h vs Ice + Water 0 °C          | 16.4              | 12.5         | 20.3         | 0.00000        |

| <b>EXTERNAL TEMPERATURE DELTA (°C, 0-30 min)</b> | <b>Difference</b> | <b>Lower</b> | <b>Upper</b> | <b>P-value</b> |
|--------------------------------------------------|-------------------|--------------|--------------|----------------|
| Cryochaps Front 24h vs Ice Cubes in a Boot       | 0.6               | -3.2         | 4.5          | 1.00000        |
| Cryochaps Front 24h vs Ice Horse 24h             | 6.9               | 3.0          | 10.8         | 0.00003        |
| Cryochaps Front 24h vs Ice Vibe 24h +Vibe        | 4.2               | 0.3          | 8.1          | 0.02392        |
| Cryochaps Front 24h vs Ice Vibe 24h -Vibe        | 1.0               | -2.9         | 4.8          | 0.99970        |
| Cryochaps Front 24h vs Premier Water 15 °C       | 9.8               | 5.9          | 13.7         | 0.00000        |
| Flask Only vs Flask Only + Bandage               | 0.0               | -3.9         | 3.9          | 1.00000        |
| Flask Only vs Green Ice Gel 15 °C                | 5.9               | 2.0          | 9.8          | 0.00034        |
| Flask Only vs Hosing 15 °C                       | 15.9              | 12.0         | 19.7         | 0.00000        |
| Flask Only vs Hypacool                           | 2.2               | -1.6         | 6.1          | 0.70238        |
| Flask Only vs Ice + Water 0 °C                   | 29.9              | 26.1         | 33.8         | 0.00000        |
| Flask Only vs Ice Cubes in a Boot                | 14.2              | 10.3         | 18.0         | 0.00000        |
| Flask Only vs Ice Horse 24h                      | 20.4              | 16.6         | 24.3         | 0.00000        |
| Flask Only vs Ice Vibe 24h +Vibe                 | 9.3               | 5.5          | 13.2         | 0.00000        |
| Flask Only vs Ice Vibe 24h -Vibe                 | 12.6              | 8.7          | 16.4         | 0.00000        |
| Flask Only vs Premier Water 15 °C                | 3.7               | -0.2         | 7.6          | 0.07025        |
| Flask Only + Bandage vs Green Ice Gel 15 °C      | 5.9               | 2.0          | 9.8          | 0.00034        |
| Flask Only + Bandage vs Hosing 15 °C             | 15.9              | 12.0         | 19.7         | 0.00000        |
| Flask Only + Bandage vs Hypacool                 | 2.2               | -1.6         | 6.1          | 0.70238        |
| Flask Only + Bandage vs Ice + Water 0 °C         | 29.9              | 26.1         | 33.8         | 0.00000        |
| Flask Only + Bandage vs Ice Cubes in a Boot      | 14.2              | 10.3         | 18.0         | 0.00000        |
| Flask Only + Bandage vs Ice Horse 24h            | 20.4              | 16.6         | 24.3         | 0.00000        |
| Flask Only + Bandage vs Ice Vibe 24h +Vibe       | 9.3               | 5.5          | 13.2         | 0.00000        |
| Flask Only + Bandage vs Ice Vibe 24h -Vibe       | 12.6              | 8.7          | 16.4         | 0.00000        |
| Flask Only + Bandage vs Premier Water 15 °C      | 3.7               | -0.2         | 7.6          | 0.07025        |
| Green Ice Gel 15 °C vs Hosing 15 °C              | 10.0              | 6.1          | 13.8         | 0.00000        |
| Green Ice Gel 15 °C vs Hypacool                  | 3.7               | -0.2         | 7.5          | 0.08025        |
| Green Ice Gel 15 °C vs Ice + Water 0 °C          | 24.0              | 20.2         | 27.9         | 0.00000        |
| Green Ice Gel 15 °C vs Ice Cubes in a Boot       | 8.3               | 4.4          | 12.1         | 0.00000        |
| Green Ice Gel 15 °C vs Ice Horse 24h             | 14.5              | 10.7         | 18.4         | 0.00000        |
| Green Ice Gel 15 °C vs Ice Vibe 24h +Vibe        | 3.4               | -0.4         | 7.3          | 0.12521        |
| Green Ice Gel 15 °C vs Ice Vibe 24h -Vibe        | 6.7               | 2.8          | 10.5         | 0.00005        |
| Green Ice Gel 15 °C vs Premier Water 15 °C       | 2.2               | -1.7         | 6.1          | 0.73903        |
| Hosing 15 °C vs Hypacool                         | 13.6              | 9.7          | 17.5         | 0.00000        |
| Hosing 15 °C vs Ice + Water 0 °C                 | 14.1              | 10.2         | 17.9         | 0.00000        |
| Hosing 15 °C vs Ice Cubes in a Boot              | 1.7               | -2.2         | 5.6          | 0.94135        |
| Hosing 15 °C vs Ice Horse 24h                    | 4.6               | 0.7          | 8.4          | 0.00999        |
| Hosing 15 °C vs Ice Vibe 24h +Vibe               | 6.5               | 2.7          | 10.4         | 0.00007        |
| Hosing 15 °C vs Ice Vibe 24h -Vibe               | 3.3               | -0.6         | 7.2          | 0.16153        |
| Hosing 15 °C vs Premier Water 15 °C              | 12.2              | 8.3          | 16.0         | 0.00000        |
| Hypacool vs Ice + Water 0 °C                     | 27.7              | 23.8         | 31.6         | 0.00000        |
| Hypacool vs Ice Cubes in a Boot                  | 11.9              | 8.0          | 15.8         | 0.00000        |
| Hypacool vs Ice Horse 24h                        | 18.2              | 14.3         | 22.1         | 0.00000        |
| Hypacool vs Ice Vibe 24h +Vibe                   | 7.1               | 3.2          | 11.0         | 0.00002        |
| Hypacool vs Ice Vibe 24h -Vibe                   | 10.3              | 6.4          | 14.2         | 0.00000        |
| Hypacool vs Premier Water 15 °C                  | 1.5               | -2.4         | 5.3          | 0.98114        |
| Ice + Water 0 °C vs Ice Cubes in a Boot          | 15.8              | 11.9         | 19.6         | 0.00000        |
| Ice + Water 0 °C vs Ice Horse 24h                | 9.5               | 5.6          | 13.4         | 0.00000        |
| Ice + Water 0 °C vs Ice Vibe 24h +Vibe           | 20.6              | 16.7         | 24.5         | 0.00000        |
| Ice + Water 0 °C vs Ice Vibe 24h -Vibe           | 17.4              | 13.5         | 21.2         | 0.00000        |
| Ice + Water 0 °C vs Premier Water 15 °C          | 26.2              | 22.3         | 30.1         | 0.00000        |
| Ice Cubes in a Boot vs Ice Horse 24h             | 6.3               | 2.4          | 10.1         | 0.00013        |
| Ice Cubes in a Boot vs Ice Vibe 24h +Vibe        | 4.8               | 1.0          | 8.7          | 0.00518        |

| <b>EXTERNAL TEMPERATURE DELTA (°C, 0-30 min)</b> | <b>Difference</b> | <b>Lower</b> | <b>Upper</b> | <b>P-value</b> |
|--------------------------------------------------|-------------------|--------------|--------------|----------------|
| Ice Cubes in a Boot vs Ice Vibe 24h -Vibe        | 1.6               | -2.3         | 5.5          | 0.96263        |
| Ice Cubes in a Boot vs Premier Water 15 °C       | 10.5              | 6.6          | 14.3         | 0.00000        |
| Ice Horse 24h vs Ice Vibe 24h +Vibe              | 11.1              | 7.2          | 15.0         | 0.00000        |
| Ice Horse 24h vs Ice Vibe 24h -Vibe              | 7.9               | 4.0          | 11.7         | 0.00000        |
| Ice Horse 24h vs Premier Water 15 °C             | 16.7              | 12.8         | 20.6         | 0.00000        |
| Ice Vibe 24h +Vibe vs Ice Vibe 24h -Vibe         | 3.2               | -0.6         | 7.1          | 0.18262        |
| Ice Vibe 24h +Vibe vs Premier Water 15 °C        | 5.6               | 1.7          | 9.5          | 0.00071        |
| Ice Vibe 24h -Vibe vs Premier Water 15 °C        | 8.9               | 5.0          | 12.7         | 0.00000        |

| <b>EXTERNAL TEMPERATURE RATE (°C/min)</b>    | <b>Difference</b> | <b>Lower</b> | <b>Upper</b> | <b>P-value</b> |
|----------------------------------------------|-------------------|--------------|--------------|----------------|
| Aerochill 16 °C vs Clay Covered 15 °C        | 0.1               | -0.1         | 0.2          | 0.69509        |
| Aerochill 16 °C vs Clay Uncovered 15 °C      | 0.1               | 0.0          | 0.2          | 0.25806        |
| Aerochill 16 °C vs Cryochaps Front 24h       | 0.3               | 0.2          | 0.5          | 0.00000        |
| Aerochill 16 °C vs Flask Only                | 0.1               | 0.0          | 0.2          | 0.14108        |
| Aerochill 16 °C vs Flask Only + Bandage      | 0.1               | 0.0          | 0.2          | 0.14108        |
| Aerochill 16 °C vs Green Ice Gel 15 °C       | 0.1               | 0.0          | 0.2          | 0.48829        |
| Aerochill 16 °C vs Hosing 15 °C              | 1.1               | 0.9          | 1.2          | 0.00000        |
| Aerochill 16 °C vs Hypacool                  | 0.0               | -0.1         | 0.2          | 0.99881        |
| Aerochill 16 °C vs Ice + Water 0 °C          | 0.9               | 0.8          | 1.0          | 0.00000        |
| Aerochill 16 °C vs Ice Cubes in a Boot       | 0.4               | 0.2          | 0.5          | 0.00000        |
| Aerochill 16 °C vs Ice Horse 24h             | 0.6               | 0.4          | 0.7          | 0.00000        |
| Aerochill 16 °C vs Ice Vibe 24h +Vibe        | 0.2               | 0.1          | 0.3          | 0.00022        |
| Aerochill 16 °C vs Ice Vibe 24h -Vibe        | 0.3               | 0.2          | 0.4          | 0.00000        |
| Aerochill 16 °C vs Premier Water 15 °C       | 0.0               | -0.1         | 0.1          | 1.00000        |
| Clay Covered 15 °C vs Clay Uncovered 15 °C   | 0.2               | 0.0          | 0.3          | 0.00162        |
| Clay Covered 15 °C vs Cryochaps Front 24h    | 0.4               | 0.3          | 0.5          | 0.00000        |
| Clay Covered 15 °C vs Flask Only             | 0.0               | -0.1         | 0.2          | 0.99865        |
| Clay Covered 15 °C vs Flask Only + Bandage   | 0.0               | -0.1         | 0.2          | 0.99865        |
| Clay Covered 15 °C vs Green Ice Gel 15 °C    | 0.2               | 0.0          | 0.3          | 0.00491        |
| Clay Covered 15 °C vs Hosing 15 °C           | 1.1               | 1.0          | 1.3          | 0.00000        |
| Clay Covered 15 °C vs Hypacool               | 0.0               | -0.1         | 0.2          | 0.99793        |
| Clay Covered 15 °C vs Ice + Water 0 °C       | 1.0               | 0.8          | 1.1          | 0.00000        |
| Clay Covered 15 °C vs Ice Cubes in a Boot    | 0.4               | 0.3          | 0.6          | 0.00000        |
| Clay Covered 15 °C vs Ice Horse 24h          | 0.6               | 0.5          | 0.8          | 0.00000        |
| Clay Covered 15 °C vs Ice Vibe 24h +Vibe     | 0.3               | 0.1          | 0.4          | 0.00000        |
| Clay Covered 15 °C vs Ice Vibe 24h -Vibe     | 0.4               | 0.3          | 0.5          | 0.00000        |
| Clay Covered 15 °C vs Premier Water 15 °C    | 0.1               | 0.0          | 0.2          | 0.45809        |
| Clay Uncovered 15 °C vs Cryochaps Front 24h  | 0.2               | 0.1          | 0.4          | 0.00001        |
| Clay Uncovered 15 °C vs Flask Only           | 0.2               | 0.1          | 0.3          | 0.00009        |
| Clay Uncovered 15 °C vs Flask Only + Bandage | 0.2               | 0.1          | 0.3          | 0.00009        |
| Clay Uncovered 15 °C vs Green Ice Gel 15 °C  | 0.0               | -0.1         | 0.1          | 1.00000        |
| Clay Uncovered 15 °C vs Hosing 15 °C         | 1.0               | 0.8          | 1.1          | 0.00000        |
| Clay Uncovered 15 °C vs Hypacool             | 0.1               | 0.0          | 0.3          | 0.02789        |
| Clay Uncovered 15 °C vs Ice + Water 0 °C     | 0.8               | 0.7          | 0.9          | 0.00000        |
| Clay Uncovered 15 °C vs Ice Cubes in a Boot  | 0.3               | 0.1          | 0.4          | 0.00000        |
| Clay Uncovered 15 °C vs Ice Horse 24h        | 0.5               | 0.3          | 0.6          | 0.00000        |
| Clay Uncovered 15 °C vs Ice Vibe 24h +Vibe   | 0.1               | 0.0          | 0.2          | 0.25806        |
| Clay Uncovered 15 °C vs Ice Vibe 24h -Vibe   | 0.2               | 0.1          | 0.3          | 0.00012        |
| Clay Uncovered 15 °C vs Premier Water 15 °C  | 0.1               | 0.0          | 0.2          | 0.45809        |
| Cryochaps Front 24h vs Flask Only            | 0.5               | 0.3          | 0.6          | 0.00000        |
| Cryochaps Front 24h vs Flask Only + Bandage  | 0.5               | 0.3          | 0.6          | 0.00000        |
| Cryochaps Front 24h vs Green Ice Gel 15 °C   | 0.3               | 0.1          | 0.4          | 0.00000        |



| <b>EXTERNAL TEMPERATURE RATE (°C/min)</b>   | <b>Difference</b> | <b>Lower</b> | <b>Upper</b> | <b>P-value</b> |
|---------------------------------------------|-------------------|--------------|--------------|----------------|
| Cryochaps Front 24h vs Hosing 15 °C         | 0.7               | 0.6          | 0.9          | 0.00000        |
| Cryochaps Front 24h vs Hypacool             | 0.4               | 0.2          | 0.5          | 0.00000        |
| Cryochaps Front 24h vs Ice + Water 0 °C     | 0.5               | 0.4          | 0.7          | 0.00000        |
| Cryochaps Front 24h vs Ice Cubes in a Boot  | 0.0               | -0.1         | 0.1          | 1.00000        |
| Cryochaps Front 24h vs Ice Horse 24h        | 0.2               | 0.1          | 0.4          | 0.00002        |
| Cryochaps Front 24h vs Ice Vibe 24h +Vibe   | 0.1               | 0.0          | 0.3          | 0.02137        |
| Cryochaps Front 24h vs Ice Vibe 24h -Vibe   | 0.0               | -0.1         | 0.2          | 0.99966        |
| Cryochaps Front 24h vs Premier Water 15 °C  | 0.3               | 0.2          | 0.5          | 0.00000        |
| Flask Only vs Flask Only + Bandage          | 0.0               | -0.1         | 0.1          | 1.00000        |
| Flask Only vs Green Ice Gel 15 °C           | 0.2               | 0.1          | 0.3          | 0.00029        |
| Flask Only vs Hosing 15 °C                  | 1.2               | 1.1          | 1.3          | 0.00000        |
| Flask Only vs Hypacool                      | 0.1               | -0.1         | 0.2          | 0.68705        |
| Flask Only vs Ice + Water 0 °C              | 1.0               | 0.9          | 1.1          | 0.00000        |
| Flask Only vs Ice Cubes in a Boot           | 0.5               | 0.3          | 0.6          | 0.00000        |
| Flask Only vs Ice Horse 24h                 | 0.7               | 0.6          | 0.8          | 0.00000        |
| Flask Only vs Ice Vibe 24h +Vibe            | 0.3               | 0.2          | 0.4          | 0.00000        |
| Flask Only vs Ice Vibe 24h -Vibe            | 0.4               | 0.3          | 0.5          | 0.00000        |
| Flask Only vs Premier Water 15 °C           | 0.1               | 0.0          | 0.3          | 0.06414        |
| Flask Only + Bandage vs Green Ice Gel 15 °C | 0.2               | 0.1          | 0.3          | 0.00029        |
| Flask Only + Bandage vs Hosing 15 °C        | 1.2               | 1.1          | 1.3          | 0.00000        |
| Flask Only + Bandage vs Hypacool            | 0.1               | -0.1         | 0.2          | 0.68705        |
| Flask Only + Bandage vs Ice + Water 0 °C    | 1.0               | 0.9          | 1.1          | 0.00000        |
| Flask Only + Bandage vs Ice Cubes in a Boot | 0.5               | 0.3          | 0.6          | 0.00000        |
| Flask Only + Bandage vs Ice Horse 24h       | 0.7               | 0.6          | 0.8          | 0.00000        |
| Flask Only + Bandage vs Ice Vibe 24h +Vibe  | 0.3               | 0.2          | 0.4          | 0.00000        |
| Flask Only + Bandage vs Ice Vibe 24h -Vibe  | 0.4               | 0.3          | 0.5          | 0.00000        |
| Flask Only + Bandage vs Premier Water 15 °C | 0.1               | 0.0          | 0.3          | 0.06414        |
| Green Ice Gel 15 °C vs Hosing 15 °C         | 1.0               | 0.9          | 1.1          | 0.00000        |
| Green Ice Gel 15 °C vs Hypacool             | 0.1               | 0.0          | 0.2          | 0.07349        |
| Green Ice Gel 15 °C vs Ice + Water 0 °C     | 0.8               | 0.7          | 0.9          | 0.00000        |
| Green Ice Gel 15 °C vs Ice Cubes in a Boot  | 0.3               | 0.1          | 0.4          | 0.00000        |
| Green Ice Gel 15 °C vs Ice Horse 24h        | 0.5               | 0.4          | 0.6          | 0.00000        |
| Green Ice Gel 15 °C vs Ice Vibe 24h +Vibe   | 0.1               | 0.0          | 0.2          | 0.11586        |
| Green Ice Gel 15 °C vs Ice Vibe 24h -Vibe   | 0.2               | 0.1          | 0.3          | 0.00004        |
| Green Ice Gel 15 °C vs Premier Water 15 °C  | 0.1               | -0.1         | 0.2          | 0.72469        |
| Hosing 15 °C vs Hypacool                    | 1.1               | 1.0          | 1.2          | 0.00000        |
| Hosing 15 °C vs Ice + Water 0 °C            | 0.2               | 0.1          | 0.3          | 0.00105        |
| Hosing 15 °C vs Ice Cubes in a Boot         | 0.7               | 0.6          | 0.8          | 0.00000        |
| Hosing 15 °C vs Ice Horse 24h               | 0.5               | 0.4          | 0.6          | 0.00000        |
| Hosing 15 °C vs Ice Vibe 24h +Vibe          | 0.9               | 0.7          | 1.0          | 0.00000        |
| Hosing 15 °C vs Ice Vibe 24h -Vibe          | 0.8               | 0.6          | 0.9          | 0.00000        |
| Hosing 15 °C vs Premier Water 15 °C         | 1.1               | 0.9          | 1.2          | 0.00000        |
| Hypacool vs Ice + Water 0 °C                | 0.9               | 0.8          | 1.1          | 0.00000        |
| Hypacool vs Ice Cubes in a Boot             | 0.4               | 0.3          | 0.5          | 0.00000        |
| Hypacool vs Ice Horse 24h                   | 0.6               | 0.5          | 0.7          | 0.00000        |
| Hypacool vs Ice Vibe 24h +Vibe              | 0.2               | 0.1          | 0.4          | 0.00001        |
| Hypacool vs Ice Vibe 24h -Vibe              | 0.3               | 0.2          | 0.5          | 0.00000        |
| Hypacool vs Premier Water 15 °C             | 0.0               | -0.1         | 0.2          | 0.97925        |
| Ice + Water 0 °C vs Ice Cubes in a Boot     | 0.5               | 0.4          | 0.7          | 0.00000        |
| Ice + Water 0 °C vs Ice Horse 24h           | 0.3               | 0.2          | 0.4          | 0.00000        |
| Ice + Water 0 °C vs Ice Vibe 24h +Vibe      | 0.7               | 0.6          | 0.8          | 0.00000        |
| Ice + Water 0 °C vs Ice Vibe 24h -Vibe      | 0.6               | 0.5          | 0.7          | 0.00000        |

| <b>EXTERNAL TEMPERATURE RATE (°C/min)</b>  | <b>Difference</b> | <b>Lower</b> | <b>Upper</b> | <b>P-value</b> |
|--------------------------------------------|-------------------|--------------|--------------|----------------|
| EXTERNAL TEMPERATURE RATE (°C/min) cont.   | Difference        | Lower        | Upper        | P-value        |
| Ice + Water 0 °C vs Premier Water 15 °C    | 0.9               | 0.7          | 1.0          | 0.00000        |
| Ice Cubes in a Boot vs Ice Horse 24h       | 0.2               | 0.1          | 0.3          | 0.00011        |
| Ice Cubes in a Boot vs Ice Vibe 24h +Vibe  | 0.2               | 0.0          | 0.3          | 0.00451        |
| Ice Cubes in a Boot vs Ice Vibe 24h -Vibe  | 0.1               | -0.1         | 0.2          | 0.95922        |
| Ice Cubes in a Boot vs Premier Water 15 °C | 0.3               | 0.2          | 0.5          | 0.00000        |
| Ice Horse 24h vs Ice Vibe 24h +Vibe        | 0.4               | 0.2          | 0.5          | 0.00000        |
| Ice Horse 24h vs Ice Vibe 24h -Vibe        | 0.3               | 0.1          | 0.4          | 0.00000        |
| Ice Horse 24h vs Premier Water 15 °C       | 0.6               | 0.4          | 0.7          | 0.00000        |
| Ice Vibe 24h +Vibe vs Ice Vibe 24h -Vibe   | 0.1               | 0.0          | 0.2          | 0.17062        |
| Ice Vibe 24h +Vibe vs Premier Water 15 °C  | 0.2               | 0.1          | 0.3          | 0.00060        |
| Ice Vibe 24h -Vibe vs Premier Water 15 °C  | 0.3               | 0.2          | 0.4          | 0.00000        |

| <b>INTERNAL TEMPERATURE START (°C, 0 min)</b> | <b>Difference</b> | <b>Lower</b> | <b>Upper</b> | <b>P-value</b> |
|-----------------------------------------------|-------------------|--------------|--------------|----------------|
| Aerochill 16 °C vs Clay Covered 15 °C         | 0.7               | 0.6          | 0.8          | 0.00000        |
| Aerochill 16 °C vs Clay Uncovered 15 °C       | 0.9               | 0.8          | 1.1          | 0.00000        |
| Aerochill 16 °C vs Cryochaps Front 24h        | 0.3               | 0.2          | 0.5          | 0.00000        |
| Aerochill 16 °C vs Flask Only                 | 0.4               | 0.3          | 0.6          | 0.00000        |
| Aerochill 16 °C vs Flask Only + Bandage       | 0.8               | 0.6          | 0.9          | 0.00000        |
| Aerochill 16 °C vs Green Ice Gel 15 °C        | 0.7               | 0.5          | 0.8          | 0.00000        |
| Aerochill 16 °C vs Hosing 15 °C               | 0.7               | 0.6          | 0.9          | 0.00000        |
| Aerochill 16 °C vs Hypacool                   | 1.2               | 1.1          | 1.3          | 0.00000        |
| Aerochill 16 °C vs Ice + Water 0 °C           | 0.8               | 0.7          | 1.0          | 0.00000        |
| Aerochill 16 °C vs Ice Cubes in a Boot        | 0.4               | 0.3          | 0.5          | 0.00000        |
| Aerochill 16 °C vs Ice Horse 24h              | 0.3               | 0.1          | 0.4          | 0.00000        |
| Aerochill 16 °C vs Ice Vibe 24h +Vibe         | 0.6               | 0.4          | 0.7          | 0.00000        |
| Aerochill 16 °C vs Ice Vibe 24h -Vibe         | 0.3               | 0.1          | 0.4          | 0.00000        |
| Aerochill 16 °C vs Premier Water 15 °C        | 0.7               | 0.5          | 0.8          | 0.00000        |
| Clay Covered 15 °C vs Clay Uncovered 15 °C    | 0.2               | 0.1          | 0.3          | 0.00006        |
| Clay Covered 15 °C vs Cryochaps Front 24h     | 1.1               | 0.9          | 1.2          | 0.00000        |
| Clay Covered 15 °C vs Flask Only              | 1.2               | 1.0          | 1.3          | 0.00000        |
| Clay Covered 15 °C vs Flask Only + Bandage    | 1.5               | 1.4          | 1.6          | 0.00000        |
| Clay Covered 15 °C vs Green Ice Gel 15 °C     | 0.1               | -0.1         | 0.2          | 0.97549        |
| Clay Covered 15 °C vs Hosing 15 °C            | 1.5               | 1.3          | 1.6          | 0.00000        |
| Clay Covered 15 °C vs Hypacool                | 0.5               | 0.4          | 0.6          | 0.00000        |
| Clay Covered 15 °C vs Ice + Water 0 °C        | 0.1               | 0.0          | 0.2          | 0.10124        |
| Clay Covered 15 °C vs Ice Cubes in a Boot     | 1.1               | 1.0          | 1.2          | 0.00000        |
| Clay Covered 15 °C vs Ice Horse 24h           | 1.0               | 0.9          | 1.1          | 0.00000        |
| Clay Covered 15 °C vs Ice Vibe 24h +Vibe      | 1.3               | 1.2          | 1.4          | 0.00000        |
| Clay Covered 15 °C vs Ice Vibe 24h -Vibe      | 1.0               | 0.9          | 1.1          | 0.00000        |
| Clay Covered 15 °C vs Premier Water 15 °C     | 0.1               | -0.1         | 0.2          | 0.97549        |
| Clay Uncovered 15 °C vs Cryochaps Front 24h   | 1.3               | 1.1          | 1.4          | 0.00000        |
| Clay Uncovered 15 °C vs Flask Only            | 1.4               | 1.2          | 1.5          | 0.00000        |
| Clay Uncovered 15 °C vs Flask Only + Bandage  | 1.7               | 1.6          | 1.8          | 0.00000        |
| Clay Uncovered 15 °C vs Green Ice Gel 15 °C   | 0.3               | 0.1          | 0.4          | 0.00000        |
| Clay Uncovered 15 °C vs Hosing 15 °C          | 1.7               | 1.5          | 1.8          | 0.00000        |
| Clay Uncovered 15 °C vs Hypacool              | 0.3               | 0.1          | 0.4          | 0.00000        |
| Clay Uncovered 15 °C vs Ice + Water 0 °C      | 0.1               | 0.0          | 0.2          | 0.25806        |
| Clay Uncovered 15 °C vs Ice Cubes in a Boot   | 1.3               | 1.2          | 1.5          | 0.00000        |
| Clay Uncovered 15 °C vs Ice Horse 24h         | 1.2               | 1.1          | 1.3          | 0.00000        |
| Clay Uncovered 15 °C vs Ice Vibe 24h +Vibe    | 1.5               | 1.4          | 1.6          | 0.00000        |
| Clay Uncovered 15 °C vs Ice Vibe 24h -Vibe    | 1.2               | 1.1          | 1.3          | 0.00000        |

| <b>INTERNAL TEMPERATURE START (°C, 0 min)</b> | <b>Difference</b> | <b>Lower</b> | <b>Upper</b> | <b>P-value</b> |
|-----------------------------------------------|-------------------|--------------|--------------|----------------|
| Clay Uncovered 15 °C vs Premier Water 15 °C   | 0.3               | 0.1          | 0.4          | 0.00000        |
| Cryochaps Front 24h vs Flask Only             | 0.1               | 0.0          | 0.2          | 0.25806        |
| Cryochaps Front 24h vs Flask Only + Bandage   | 0.4               | 0.3          | 0.6          | 0.00000        |
| Cryochaps Front 24h vs Green Ice Gel 15 °C    | 1.0               | 0.9          | 1.1          | 0.00000        |
| Cryochaps Front 24h vs Hosing 15 °C           | 0.4               | 0.3          | 0.5          | 0.00000        |
| Cryochaps Front 24h vs Hypacool               | 1.5               | 1.4          | 1.7          | 0.00000        |
| Cryochaps Front 24h vs Ice + Water 0 °C       | 1.2               | 1.0          | 1.3          | 0.00000        |
| Cryochaps Front 24h vs Ice Cubes in a Boot    | 0.1               | -0.1         | 0.2          | 0.82335        |
| Cryochaps Front 24h vs Ice Horse 24h          | 0.1               | -0.1         | 0.2          | 0.82335        |
| Cryochaps Front 24h vs Ice Vibe 24h +Vibe     | 0.2               | 0.1          | 0.4          | 0.00002        |
| Cryochaps Front 24h vs Ice Vibe 24h -Vibe     | 0.1               | -0.1         | 0.2          | 0.82335        |
| Cryochaps Front 24h vs Premier Water 15 °C    | 1.0               | 0.9          | 1.1          | 0.00000        |
| Flask Only vs Flask Only + Bandage            | 0.3               | 0.2          | 0.5          | 0.00000        |
| Flask Only vs Green Ice Gel 15 °C             | 1.1               | 1.0          | 1.2          | 0.00000        |
| Flask Only vs Hosing 15 °C                    | 0.3               | 0.2          | 0.4          | 0.00000        |
| Flask Only vs Hypacool                        | 1.6               | 1.5          | 1.8          | 0.00000        |
| Flask Only vs Ice + Water 0 °C                | 1.3               | 1.1          | 1.4          | 0.00000        |
| Flask Only vs Ice Cubes in a Boot             | 0.0               | -0.1         | 0.2          | 0.99951        |
| Flask Only vs Ice Horse 24h                   | 0.2               | 0.0          | 0.3          | 0.00296        |
| Flask Only vs Ice Vibe 24h +Vibe              | 0.1               | 0.0          | 0.3          | 0.03408        |
| Flask Only vs Ice Vibe 24h -Vibe              | 0.2               | 0.0          | 0.3          | 0.00296        |
| Flask Only vs Premier Water 15 °C             | 1.1               | 1.0          | 1.2          | 0.00000        |
| Flask Only + Bandage vs Green Ice Gel 15 °C   | 1.4               | 1.3          | 1.6          | 0.00000        |
| Flask Only + Bandage vs Hosing 15 °C          | 0.0               | -0.1         | 0.2          | 0.99951        |
| Flask Only + Bandage vs Hypacool              | 2.0               | 1.8          | 2.1          | 0.00000        |
| Flask Only + Bandage vs Ice + Water 0 °C      | 1.6               | 1.5          | 1.7          | 0.00000        |
| Flask Only + Bandage vs Ice Cubes in a Boot   | 0.4               | 0.2          | 0.5          | 0.00000        |
| Flask Only + Bandage vs Ice Horse 24h         | 0.5               | 0.4          | 0.6          | 0.00000        |
| Flask Only + Bandage vs Ice Vibe 24h +Vibe    | 0.2               | 0.1          | 0.3          | 0.00022        |
| Flask Only + Bandage vs Ice Vibe 24h -Vibe    | 0.5               | 0.4          | 0.6          | 0.00000        |
| Flask Only + Bandage vs Premier Water 15 °C   | 1.4               | 1.3          | 1.6          | 0.00000        |
| Green Ice Gel 15 °C vs Hosing 15 °C           | 1.4               | 1.3          | 1.5          | 0.00000        |
| Green Ice Gel 15 °C vs Hypacool               | 0.5               | 0.4          | 0.7          | 0.00000        |
| Green Ice Gel 15 °C vs Ice + Water 0 °C       | 0.2               | 0.0          | 0.3          | 0.00296        |
| Green Ice Gel 15 °C vs Ice Cubes in a Boot    | 1.1               | 0.9          | 1.2          | 0.00000        |
| Green Ice Gel 15 °C vs Ice Horse 24h          | 0.9               | 0.8          | 1.1          | 0.00000        |
| Green Ice Gel 15 °C vs Ice Vibe 24h +Vibe     | 1.2               | 1.1          | 1.4          | 0.00000        |
| Green Ice Gel 15 °C vs Ice Vibe 24h -Vibe     | 0.9               | 0.8          | 1.1          | 0.00000        |
| Green Ice Gel 15 °C vs Premier Water 15 °C    | 0.0               | -0.1         | 0.1          | 1.00000        |
| Hosing 15 °C vs Hypacool                      | 1.9               | 1.8          | 2.1          | 0.00000        |
| Hosing 15 °C vs Ice + Water 0 °C              | 1.6               | 1.4          | 1.7          | 0.00000        |
| Hosing 15 °C vs Ice Cubes in a Boot           | 0.3               | 0.2          | 0.5          | 0.00000        |
| Hosing 15 °C vs Ice Horse 24h                 | 0.5               | 0.3          | 0.6          | 0.00000        |
| Hosing 15 °C vs Ice Vibe 24h +Vibe            | 0.2               | 0.0          | 0.3          | 0.00296        |
| Hosing 15 °C vs Ice Vibe 24h -Vibe            | 0.5               | 0.3          | 0.6          | 0.00000        |
| Hosing 15 °C vs Premier Water 15 °C           | 1.4               | 1.3          | 1.5          | 0.00000        |
| Hypacool vs Ice + Water 0 °C                  | 0.4               | 0.2          | 0.5          | 0.00000        |
| Hypacool vs Ice Cubes in a Boot               | 1.6               | 1.5          | 1.7          | 0.00000        |
| Hypacool vs Ice Horse 24h                     | 1.5               | 1.3          | 1.6          | 0.00000        |
| Hypacool vs Ice Vibe 24h +Vibe                | 1.8               | 1.6          | 1.9          | 0.00000        |
| Hypacool vs Ice Vibe 24h -Vibe                | 1.5               | 1.3          | 1.6          | 0.00000        |
| Hypacool vs Premier Water 15 °C               | 0.5               | 0.4          | 0.7          | 0.00000        |

| <b>INTERNAL TEMPERATURE START (°C, 0 min)</b> | <b>Difference</b> | <b>Lower</b> | <b>Upper</b> | <b>P-value</b> |
|-----------------------------------------------|-------------------|--------------|--------------|----------------|
| Ice + Water 0 °C vs Ice Cubes in a Boot       | 1.2               | 1.1          | 1.4          | 0.00000        |
| Ice + Water 0 °C vs Ice Horse 24h             | 1.1               | 1.0          | 1.2          | 0.00000        |
| Ice + Water 0 °C vs Ice Vibe 24h +Vibe        | 1.4               | 1.3          | 1.5          | 0.00000        |
| Ice + Water 0 °C vs Ice Vibe 24h -Vibe        | 1.1               | 1.0          | 1.2          | 0.00000        |
| Ice + Water 0 °C vs Premier Water 15 °C       | 0.2               | 0.0          | 0.3          | 0.00296        |
| Ice Cubes in a Boot vs Ice Horse 24h          | 0.1               | 0.0          | 0.3          | 0.03408        |
| Ice Cubes in a Boot vs Ice Vibe 24h +Vibe     | 0.2               | 0.0          | 0.3          | 0.00296        |
| Ice Cubes in a Boot vs Ice Vibe 24h -Vibe     | 0.1               | 0.0          | 0.3          | 0.03408        |
| Ice Cubes in a Boot vs Premier Water 15 °C    | 1.1               | 0.9          | 1.2          | 0.00000        |
| Ice Horse 24h vs Ice Vibe 24h +Vibe           | 0.3               | 0.2          | 0.4          | 0.00000        |
| Ice Horse 24h vs Ice Vibe 24h -Vibe           | 0.0               | -0.1         | 0.1          | 1.00000        |
| Ice Horse 24h vs Premier Water 15 °C          | 0.9               | 0.8          | 1.1          | 0.00000        |
| Ice Vibe 24h +Vibe vs Ice Vibe 24h -Vibe      | 0.3               | 0.2          | 0.4          | 0.00000        |
| Ice Vibe 24h +Vibe vs Premier Water 15 °C     | 1.2               | 1.1          | 1.4          | 0.00000        |
| Ice Vibe 24h -Vibe vs Premier Water 15 °C     | 0.9               | 0.8          | 1.1          | 0.00000        |

| <b>INTERNAL TEMPERATURE END (°C, 30 min)</b> | <b>Difference</b> | <b>Lower</b> | <b>Upper</b> | <b>P-value</b> |
|----------------------------------------------|-------------------|--------------|--------------|----------------|
| Aerochill 16 °C vs Clay Covered 15 °C        | 2.3               | -0.1         | 4.8          | 0.07565        |
| Aerochill 16 °C vs Clay Uncovered 15 °C      | 1.4               | -1.1         | 3.9          | 0.72440        |
| Aerochill 16 °C vs Cryochaps Front 24h       | 10.4              | 7.9          | 12.9         | 0.00000        |
| Aerochill 16 °C vs Flask Only                | 3.5               | 1.0          | 5.9          | 0.00103        |
| Aerochill 16 °C vs Flask Only + Bandage      | 2.8               | 0.4          | 5.3          | 0.01261        |
| Aerochill 16 °C vs Green Ice Gel 15 °C       | 2.3               | -0.1         | 4.8          | 0.07565        |
| Aerochill 16 °C vs Hosing 15 °C              | 13.1              | 10.6         | 15.5         | 0.00000        |
| Aerochill 16 °C vs Hypacool                  | 0.6               | -1.9         | 3.1          | 0.99977        |
| Aerochill 16 °C vs Ice + Water 0 °C          | 27.7              | 25.2         | 30.1         | 0.00000        |
| Aerochill 16 °C vs Ice Cubes in a Boot       | 8.3               | 5.8          | 10.7         | 0.00000        |
| Aerochill 16 °C vs Ice Horse 24h             | 10.4              | 7.9          | 12.8         | 0.00000        |
| Aerochill 16 °C vs Ice Vibe 24h +Vibe        | 6.2               | 3.7          | 8.7          | 0.00000        |
| Aerochill 16 °C vs Ice Vibe 24h -Vibe        | 6.5               | 4.0          | 9.0          | 0.00000        |
| Aerochill 16 °C vs Premier Water 15 °C       | 0.5               | -2.0         | 2.9          | 0.99999        |
| Clay Covered 15 °C vs Clay Uncovered 15 °C   | 3.7               | 1.3          | 6.2          | 0.00035        |
| Clay Covered 15 °C vs Cryochaps Front 24h    | 12.7              | 10.3         | 15.2         | 0.00000        |
| Clay Covered 15 °C vs Flask Only             | 1.1               | -1.3         | 3.6          | 0.91674        |
| Clay Covered 15 °C vs Flask Only + Bandage   | 0.5               | -2.0         | 3.0          | 0.99997        |
| Clay Covered 15 °C vs Green Ice Gel 15 °C    | 4.7               | 2.2          | 7.1          | 0.00001        |
| Clay Covered 15 °C vs Hosing 15 °C           | 15.4              | 12.9         | 17.9         | 0.00000        |
| Clay Covered 15 °C vs Hypacool               | 1.7               | -0.7         | 4.2          | 0.40725        |
| Clay Covered 15 °C vs Ice + Water 0 °C       | 30.0              | 27.5         | 32.5         | 0.00000        |
| Clay Covered 15 °C vs Ice Cubes in a Boot    | 10.6              | 8.1          | 13.1         | 0.00000        |
| Clay Covered 15 °C vs Ice Horse 24h          | 12.7              | 10.2         | 15.2         | 0.00000        |
| Clay Covered 15 °C vs Ice Vibe 24h +Vibe     | 8.5               | 6.1          | 11.0         | 0.00000        |
| Clay Covered 15 °C vs Ice Vibe 24h -Vibe     | 8.8               | 6.4          | 11.3         | 0.00000        |
| Clay Covered 15 °C vs Premier Water 15 °C    | 2.8               | 0.3          | 5.3          | 0.01430        |
| Clay Uncovered 15 °C vs Cryochaps Front 24h  | 9.0               | 6.5          | 11.5         | 0.00000        |
| Clay Uncovered 15 °C vs Flask Only           | 4.9               | 2.4          | 7.3          | 0.00000        |
| Clay Uncovered 15 °C vs Flask Only + Bandage | 4.2               | 1.8          | 6.7          | 0.00005        |
| Clay Uncovered 15 °C vs Green Ice Gel 15 °C  | 0.9               | -1.5         | 3.4          | 0.98086        |
| Clay Uncovered 15 °C vs Hosing 15 °C         | 11.7              | 9.2          | 14.1         | 0.00000        |
| Clay Uncovered 15 °C vs Hypacool             | 2.0               | -0.5         | 4.5          | 0.20982        |
| Clay Uncovered 15 °C vs Ice + Water 0 °C     | 26.3              | 23.8         | 28.7         | 0.00000        |
| Clay Uncovered 15 °C vs Ice Cubes in a Boot  | 6.9               | 4.4          | 9.3          | 0.00000        |

| <b>INTERNAL TEMPERATURE END (°C, 30 min)</b> | <b>Difference</b> | <b>Lower</b> | <b>Upper</b> | <b>P-value</b> |
|----------------------------------------------|-------------------|--------------|--------------|----------------|
| Clay Uncovered 15 °C vs Ice Horse 24h        | 9.0               | 6.5          | 11.4         | 0.00000        |
| Clay Uncovered 15 °C vs Ice Vibe 24h +Vibe   | 4.8               | 2.3          | 7.3          | 0.00000        |
| Clay Uncovered 15 °C vs Ice Vibe 24h -Vibe   | 5.1               | 2.6          | 7.6          | 0.00000        |
| Clay Uncovered 15 °C vs Premier Water 15 °C  | 0.9               | -1.5         | 3.4          | 0.98086        |
| Cryochaps Front 24h vs Flask Only            | 13.9              | 11.4         | 16.3         | 0.00000        |
| Cryochaps Front 24h vs Flask Only + Bandage  | 13.2              | 10.8         | 15.7         | 0.00000        |
| Cryochaps Front 24h vs Green Ice Gel 15 °C   | 8.1               | 5.6          | 10.5         | 0.00000        |
| Cryochaps Front 24h vs Hosing 15 °C          | 2.7               | 0.2          | 5.1          | 0.02351        |
| Cryochaps Front 24h vs Hypacool              | 11.0              | 8.5          | 13.5         | 0.00000        |
| Cryochaps Front 24h vs Ice + Water 0 °C      | 17.3              | 14.8         | 19.7         | 0.00000        |
| Cryochaps Front 24h vs Ice Cubes in a Boot   | 2.1               | -0.3         | 4.6          | 0.14261        |
| Cryochaps Front 24h vs Ice Horse 24h         | 0.0               | -2.4         | 2.5          | 1.00000        |
| Cryochaps Front 24h vs Ice Vibe 24h +Vibe    | 4.2               | 1.7          | 6.7          | 0.00005        |
| Cryochaps Front 24h vs Ice Vibe 24h -Vibe    | 3.9               | 1.4          | 6.4          | 0.00018        |
| Cryochaps Front 24h vs Premier Water 15 °C   | 9.9               | 7.5          | 12.4         | 0.00000        |
| Flask Only vs Flask Only + Bandage           | 0.6               | -1.8         | 3.1          | 0.99957        |
| Flask Only vs Green Ice Gel 15 °C            | 5.8               | 3.3          | 8.3          | 0.00000        |
| Flask Only vs Hosing 15 °C                   | 16.5              | 14.1         | 19.0         | 0.00000        |
| Flask Only vs Hypacool                       | 2.9               | 0.4          | 5.3          | 0.01111        |
| Flask Only vs Ice + Water 0 °C               | 31.1              | 28.7         | 33.6         | 0.00000        |
| Flask Only vs Ice Cubes in a Boot            | 11.7              | 9.3          | 14.2         | 0.00000        |
| Flask Only vs Ice Horse 24h                  | 13.8              | 11.4         | 16.3         | 0.00000        |
| Flask Only vs Ice Vibe 24h +Vibe             | 9.7               | 7.2          | 12.1         | 0.00000        |
| Flask Only vs Ice Vibe 24h -Vibe             | 10.0              | 7.5          | 12.4         | 0.00000        |
| Flask Only vs Premier Water 15 °C            | 3.9               | 1.5          | 6.4          | 0.00015        |
| Flask Only + Bandage vs Green Ice Gel 15 °C  | 5.2               | 2.7          | 7.6          | 0.00000        |
| Flask Only + Bandage vs Hosing 15 °C         | 15.9              | 13.4         | 18.4         | 0.00000        |
| Flask Only + Bandage vs Hypacool             | 2.2               | -0.2         | 4.7          | 0.10465        |
| Flask Only + Bandage vs Ice + Water 0 °C     | 30.5              | 28.0         | 33.0         | 0.00000        |
| Flask Only + Bandage vs Ice Cubes in a Boot  | 11.1              | 8.6          | 13.6         | 0.00000        |
| Flask Only + Bandage vs Ice Horse 24h        | 13.2              | 10.7         | 15.7         | 0.00000        |
| Flask Only + Bandage vs Ice Vibe 24h +Vibe   | 9.0               | 6.6          | 11.5         | 0.00000        |
| Flask Only + Bandage vs Ice Vibe 24h -Vibe   | 9.3               | 6.9          | 11.8         | 0.00000        |
| Flask Only + Bandage vs Premier Water 15 °C  | 3.3               | 0.8          | 5.8          | 0.00202        |
| Green Ice Gel 15 °C vs Hosing 15 °C          | 10.7              | 8.3          | 13.2         | 0.00000        |
| Green Ice Gel 15 °C vs Hypacool              | 2.9               | 0.5          | 5.4          | 0.00860        |
| Green Ice Gel 15 °C vs Ice + Water 0 °C      | 25.3              | 22.9         | 27.8         | 0.00000        |
| Green Ice Gel 15 °C vs Ice Cubes in a Boot   | 5.9               | 3.5          | 8.4          | 0.00000        |
| Green Ice Gel 15 °C vs Ice Horse 24h         | 8.0               | 5.6          | 10.5         | 0.00000        |
| Green Ice Gel 15 °C vs Ice Vibe 24h +Vibe    | 3.9               | 1.4          | 6.3          | 0.00020        |
| Green Ice Gel 15 °C vs Ice Vibe 24h -Vibe    | 4.2               | 1.7          | 6.6          | 0.00006        |
| Green Ice Gel 15 °C vs Premier Water 15 °C   | 1.9               | -0.6         | 4.3          | 0.29818        |
| Hosing 15 °C vs Hypacool                     | 13.7              | 11.2         | 16.1         | 0.00000        |
| Hosing 15 °C vs Ice + Water 0 °C             | 14.6              | 12.1         | 17.1         | 0.00000        |
| Hosing 15 °C vs Ice Cubes in a Boot          | 4.8               | 2.3          | 7.3          | 0.00000        |
| Hosing 15 °C vs Ice Horse 24h                | 2.7               | 0.2          | 5.2          | 0.02079        |
| Hosing 15 °C vs Ice Vibe 24h +Vibe           | 6.9               | 4.4          | 9.3          | 0.00000        |
| Hosing 15 °C vs Ice Vibe 24h -Vibe           | 6.6               | 4.1          | 9.0          | 0.00000        |
| Hosing 15 °C vs Premier Water 15 °C          | 12.6              | 10.1         | 15.1         | 0.00000        |
| Hypacool vs Ice + Water 0 °C                 | 28.3              | 25.8         | 30.7         | 0.00000        |
| Hypacool vs Ice Cubes in a Boot              | 8.9               | 6.4          | 11.3         | 0.00000        |
| Hypacool vs Ice Horse 24h                    | 11.0              | 8.5          | 13.4         | 0.00000        |

| <b>INTERNAL TEMPERATURE END (°C, 30 min)</b> | <b>Difference</b> | <b>Lower</b> | <b>Upper</b> | <b>P-value</b> |
|----------------------------------------------|-------------------|--------------|--------------|----------------|
| Hypacool vs Ice Vibe 24h +Vibe               | 6.8               | 4.3          | 9.3          | 0.00000        |
| Hypacool vs Ice Vibe 24h -Vibe               | 7.1               | 4.6          | 9.6          | 0.00000        |
| Hypacool vs Premier Water 15 °C              | 1.1               | -1.4         | 3.5          | 0.94545        |
| Ice + Water 0 °C vs Ice Cubes in a Boot      | 19.4              | 16.9         | 21.9         | 0.00000        |
| Ice + Water 0 °C vs Ice Horse 24h            | 17.3              | 14.8         | 19.8         | 0.00000        |
| Ice + Water 0 °C vs Ice Vibe 24h +Vibe       | 21.5              | 19.0         | 23.9         | 0.00000        |
| Ice + Water 0 °C vs Ice Vibe 24h -Vibe       | 21.2              | 18.7         | 23.6         | 0.00000        |
| Ice + Water 0 °C vs Premier Water 15 °C      | 27.2              | 24.7         | 29.7         | 0.00000        |
| Ice Cubes in a Boot vs Ice Horse 24h         | 2.1               | -0.4         | 4.6          | 0.15753        |
| Ice Cubes in a Boot vs Ice Vibe 24h +Vibe    | 2.1               | -0.4         | 4.5          | 0.17368        |
| Ice Cubes in a Boot vs Ice Vibe 24h -Vibe    | 1.8               | -0.7         | 4.2          | 0.37823        |
| Ice Cubes in a Boot vs Premier Water 15 °C   | 7.8               | 5.3          | 10.3         | 0.00000        |
| Ice Horse 24h vs Ice Vibe 24h +Vibe          | 4.2               | 1.7          | 6.6          | 0.00006        |
| Ice Horse 24h vs Ice Vibe 24h -Vibe          | 3.9               | 1.4          | 6.3          | 0.00020        |
| Ice Horse 24h vs Premier Water 15 °C         | 9.9               | 7.4          | 12.4         | 0.00000        |
| Ice Vibe 24h +Vibe vs Ice Vibe 24h -Vibe     | 0.3               | -2.2         | 2.8          | 1.00000        |
| Ice Vibe 24h +Vibe vs Premier Water 15 °C    | 5.7               | 3.3          | 8.2          | 0.00000        |
| Ice Vibe 24h -Vibe vs Premier Water 15 °C    | 6.0               | 3.6          | 8.5          | 0.00000        |

| <b>INTERNAL TEMPERATURE DELTA (°C, 0-30 min)</b> | <b>Difference</b> | <b>Lower</b> | <b>Upper</b> | <b>P-value</b> |
|--------------------------------------------------|-------------------|--------------|--------------|----------------|
| Aerochill 16 °C vs Clay Covered 15 °C            | 1.6               | -0.4         | 3.7          | 0.25814        |
| Aerochill 16 °C vs Clay Uncovered 15 °C          | 2.3               | 0.3          | 4.4          | 0.01568        |
| Aerochill 16 °C vs Cryochaps Front 24h           | 10.1              | 8.0          | 12.1         | 0.00000        |
| Aerochill 16 °C vs Flask Only                    | 3.9               | 1.8          | 6.0          | 0.00001        |
| Aerochill 16 °C vs Flask Only + Bandage          | 3.6               | 1.5          | 5.7          | 0.00004        |
| Aerochill 16 °C vs Green Ice Gel 15 °C           | 3.0               | 0.9          | 5.1          | 0.00068        |
| Aerochill 16 °C vs Hosing 15 °C                  | 12.3              | 10.3         | 14.4         | 0.00000        |
| Aerochill 16 °C vs Hypacool                      | 0.6               | -1.5         | 2.7          | 0.99847        |
| Aerochill 16 °C vs Ice + Water 0 °C              | 28.5              | 26.4         | 30.6         | 0.00000        |
| Aerochill 16 °C vs Ice Cubes in a Boot           | 7.9               | 5.8          | 9.9          | 0.00000        |
| Aerochill 16 °C vs Ice Horse 24h                 | 10.1              | 8.0          | 12.2         | 0.00000        |
| Aerochill 16 °C vs Ice Vibe 24h +Vibe            | 5.6               | 3.6          | 7.7          | 0.00000        |
| Aerochill 16 °C vs Ice Vibe 24h -Vibe            | 6.2               | 4.2          | 8.3          | 0.00000        |
| Aerochill 16 °C vs Premier Water 15 °C           | 1.1               | -0.9         | 3.2          | 0.77014        |
| Clay Covered 15 °C vs Clay Uncovered 15 °C       | 4.0               | 1.9          | 6.0          | 0.00001        |
| Clay Covered 15 °C vs Cryochaps Front 24h        | 11.7              | 9.6          | 13.7         | 0.00000        |
| Clay Covered 15 °C vs Flask Only                 | 2.3               | 0.2          | 4.3          | 0.01958        |
| Clay Covered 15 °C vs Flask Only + Bandage       | 2.0               | -0.1         | 4.0          | 0.06939        |
| Clay Covered 15 °C vs Green Ice Gel 15 °C        | 4.6               | 2.6          | 6.7          | 0.00000        |
| Clay Covered 15 °C vs Hosing 15 °C               | 14.0              | 11.9         | 16.0         | 0.00000        |
| Clay Covered 15 °C vs Hypacool                   | 2.2               | 0.2          | 4.3          | 0.02622        |
| Clay Covered 15 °C vs Ice + Water 0 °C           | 30.1              | 28.1         | 32.2         | 0.00000        |
| Clay Covered 15 °C vs Ice Cubes in a Boot        | 9.5               | 7.4          | 11.5         | 0.00000        |
| Clay Covered 15 °C vs Ice Horse 24h              | 11.7              | 9.7          | 13.8         | 0.00000        |
| Clay Covered 15 °C vs Ice Vibe 24h +Vibe         | 7.3               | 5.2          | 9.3          | 0.00000        |
| Clay Covered 15 °C vs Ice Vibe 24h -Vibe         | 7.9               | 5.8          | 9.9          | 0.00000        |
| Clay Covered 15 °C vs Premier Water 15 °C        | 2.8               | 0.7          | 4.8          | 0.00227        |
| Clay Uncovered 15 °C vs Cryochaps Front 24h      | 7.7               | 5.7          | 9.8          | 0.00000        |
| Clay Uncovered 15 °C vs Flask Only               | 6.2               | 4.2          | 8.3          | 0.00000        |
| Clay Uncovered 15 °C vs Flask Only + Bandage     | 5.9               | 3.9          | 8.0          | 0.00000        |
| Clay Uncovered 15 °C vs Green Ice Gel 15 °C      | 0.7               | -1.4         | 2.7          | 0.99561        |
| Clay Uncovered 15 °C vs Hosing 15 °C             | 10.0              | 7.9          | 12.1         | 0.00000        |

| <b>INTERNAL TEMPERATURE DELTA (°C, 0-30 min)</b> | <b>Difference</b> | <b>Lower</b> | <b>Upper</b> | <b>P-value</b> |
|--------------------------------------------------|-------------------|--------------|--------------|----------------|
| Clay Uncovered 15 °C vs Hypacool                 | 1.7               | -0.3         | 3.8          | 0.17611        |
| Clay Uncovered 15 °C vs Ice + Water 0 °C         | 26.2              | 24.1         | 28.2         | 0.00000        |
| Clay Uncovered 15 °C vs Ice Cubes in a Boot      | 5.5               | 3.5          | 7.6          | 0.00000        |
| Clay Uncovered 15 °C vs Ice Horse 24h            | 7.8               | 5.7          | 9.8          | 0.00000        |
| Clay Uncovered 15 °C vs Ice Vibe 24h +Vibe       | 3.3               | 1.2          | 5.4          | 0.00016        |
| Clay Uncovered 15 °C vs Ice Vibe 24h -Vibe       | 3.9               | 1.8          | 6.0          | 0.00001        |
| Clay Uncovered 15 °C vs Premier Water 15 °C      | 1.2               | -0.9         | 3.3          | 0.69909        |
| Cryochaps Front 24h vs Flask Only                | 14.0              | 11.9         | 16.0         | 0.00000        |
| Cryochaps Front 24h vs Flask Only + Bandage      | 13.7              | 11.6         | 15.7         | 0.00000        |
| Cryochaps Front 24h vs Green Ice Gel 15 °C       | 7.1               | 5.0          | 9.1          | 0.00000        |
| Cryochaps Front 24h vs Hosing 15 °C              | 2.3               | 0.2          | 4.3          | 0.02108        |
| Cryochaps Front 24h vs Hypacool                  | 9.5               | 7.4          | 11.5         | 0.00000        |
| Cryochaps Front 24h vs Ice + Water 0 °C          | 18.4              | 16.4         | 20.5         | 0.00000        |
| Cryochaps Front 24h vs Ice Cubes in a Boot       | 2.2               | 0.1          | 4.3          | 0.02818        |
| Cryochaps Front 24h vs Ice Horse 24h             | 0.0               | -2.0         | 2.1          | 1.00000        |
| Cryochaps Front 24h vs Ice Vibe 24h +Vibe        | 4.4               | 2.4          | 6.5          | 0.00000        |
| Cryochaps Front 24h vs Ice Vibe 24h -Vibe        | 3.8               | 1.8          | 5.9          | 0.00001        |
| Cryochaps Front 24h vs Premier Water 15 °C       | 8.9               | 6.9          | 11.0         | 0.00000        |
| Flask Only vs Flask Only + Bandage               | 0.3               | -1.8         | 2.4          | 1.00000        |
| Flask Only vs Green Ice Gel 15 °C                | 6.9               | 4.8          | 9.0          | 0.00000        |
| Flask Only vs Hosing 15 °C                       | 16.2              | 14.2         | 18.3         | 0.00000        |
| Flask Only vs Hypacool                           | 4.5               | 2.4          | 6.6          | 0.00000        |
| Flask Only vs Ice + Water 0 °C                   | 32.4              | 30.3         | 34.5         | 0.00000        |
| Flask Only vs Ice Cubes in a Boot                | 11.8              | 9.7          | 13.8         | 0.00000        |
| Flask Only vs Ice Horse 24h                      | 14.0              | 11.9         | 16.1         | 0.00000        |
| Flask Only vs Ice Vibe 24h +Vibe                 | 9.5               | 7.5          | 11.6         | 0.00000        |
| Flask Only vs Ice Vibe 24h -Vibe                 | 10.1              | 8.1          | 12.2         | 0.00000        |
| Flask Only vs Premier Water 15 °C                | 5.0               | 3.0          | 7.1          | 0.00000        |
| Flask Only + Bandage vs Green Ice Gel 15 °C      | 6.6               | 4.5          | 8.7          | 0.00000        |
| Flask Only + Bandage vs Hosing 15 °C             | 15.9              | 13.9         | 18.0         | 0.00000        |
| Flask Only + Bandage vs Hypacool                 | 4.2               | 2.1          | 6.3          | 0.00000        |
| Flask Only + Bandage vs Ice + Water 0 °C         | 32.1              | 30.0         | 34.2         | 0.00000        |
| Flask Only + Bandage vs Ice Cubes in a Boot      | 11.5              | 9.4          | 13.5         | 0.00000        |
| Flask Only + Bandage vs Ice Horse 24h            | 13.7              | 11.6         | 15.8         | 0.00000        |
| Flask Only + Bandage vs Ice Vibe 24h +Vibe       | 9.2               | 7.2          | 11.3         | 0.00000        |
| Flask Only + Bandage vs Ice Vibe 24h -Vibe       | 9.8               | 7.8          | 11.9         | 0.00000        |
| Flask Only + Bandage vs Premier Water 15 °C      | 4.7               | 2.7          | 6.8          | 0.00000        |
| Green Ice Gel 15 °C vs Hosing 15 °C              | 9.3               | 7.3          | 11.4         | 0.00000        |
| Green Ice Gel 15 °C vs Hypacool                  | 2.4               | 0.3          | 4.5          | 0.01162        |
| Green Ice Gel 15 °C vs Ice + Water 0 °C          | 25.5              | 23.4         | 27.6         | 0.00000        |
| Green Ice Gel 15 °C vs Ice Cubes in a Boot       | 4.9               | 2.8          | 6.9          | 0.00000        |
| Green Ice Gel 15 °C vs Ice Horse 24h             | 7.1               | 5.0          | 9.2          | 0.00000        |
| Green Ice Gel 15 °C vs Ice Vibe 24h +Vibe        | 2.6               | 0.6          | 4.7          | 0.00395        |
| Green Ice Gel 15 °C vs Ice Vibe 24h -Vibe        | 3.2               | 1.2          | 5.3          | 0.00022        |
| Green Ice Gel 15 °C vs Premier Water 15 °C       | 1.9               | -0.2         | 3.9          | 0.10899        |
| Hosing 15 °C vs Hypacool                         | 11.7              | 9.7          | 13.8         | 0.00000        |
| Hosing 15 °C vs Ice + Water 0 °C                 | 16.2              | 14.1         | 18.2         | 0.00000        |
| Hosing 15 °C vs Ice Cubes in a Boot              | 4.5               | 2.4          | 6.5          | 0.00000        |
| Hosing 15 °C vs Ice Horse 24h                    | 2.2               | 0.2          | 4.3          | 0.02439        |
| Hosing 15 °C vs Ice Vibe 24h +Vibe               | 6.7               | 4.6          | 8.8          | 0.00000        |
| Hosing 15 °C vs Ice Vibe 24h -Vibe               | 6.1               | 4.0          | 8.2          | 0.00000        |
| Hosing 15 °C vs Premier Water 15 °C              | 11.2              | 9.1          | 13.3         | 0.00000        |

| <b>INTERNAL TEMPERATURE DELTA (°C, 0-30 min)</b> | <b>Difference</b> | <b>Lower</b> | <b>Upper</b> | <b>P-value</b> |
|--------------------------------------------------|-------------------|--------------|--------------|----------------|
| Hypacool vs Ice + Water 0 °C                     | 27.9              | 25.8         | 30.0         | 0.00000        |
| Hypacool vs Ice Cubes in a Boot                  | 7.3               | 5.2          | 9.3          | 0.00000        |
| Hypacool vs Ice Horse 24h                        | 9.5               | 7.4          | 11.6         | 0.00000        |
| Hypacool vs Ice Vibe 24h +Vibe                   | 5.0               | 3.0          | 7.1          | 0.00000        |
| Hypacool vs Ice Vibe 24h -Vibe                   | 5.6               | 3.6          | 7.7          | 0.00000        |
| Hypacool vs Premier Water 15 °C                  | 0.5               | -1.5         | 2.6          | 0.99956        |
| Ice + Water 0 °C vs Ice Cubes in a Boot          | 20.6              | 18.6         | 22.7         | 0.00000        |
| Ice + Water 0 °C vs Ice Horse 24h                | 18.4              | 16.3         | 20.5         | 0.00000        |
| Ice + Water 0 °C vs Ice Vibe 24h +Vibe           | 22.9              | 20.8         | 24.9         | 0.00000        |
| Ice + Water 0 °C vs Ice Vibe 24h -Vibe           | 22.3              | 20.2         | 24.3         | 0.00000        |
| Ice + Water 0 °C vs Premier Water 15 °C          | 27.4              | 25.3         | 29.4         | 0.00000        |
| Ice Cubes in a Boot vs Ice Horse 24h             | 2.2               | 0.2          | 4.3          | 0.02439        |
| Ice Cubes in a Boot vs Ice Vibe 24h +Vibe        | 2.2               | 0.2          | 4.3          | 0.02439        |
| Ice Cubes in a Boot vs Ice Vibe 24h -Vibe        | 1.6               | -0.4         | 3.7          | 0.24500        |
| Ice Cubes in a Boot vs Premier Water 15 °C       | 6.7               | 4.7          | 8.8          | 0.00000        |
| Ice Horse 24h vs Ice Vibe 24h +Vibe              | 4.5               | 2.4          | 6.5          | 0.00000        |
| Ice Horse 24h vs Ice Vibe 24h -Vibe              | 3.9               | 1.8          | 5.9          | 0.00001        |
| Ice Horse 24h vs Premier Water 15 °C             | 9.0               | 6.9          | 11.0         | 0.00000        |
| Ice Vibe 24h +Vibe vs Ice Vibe 24h -Vibe         | 0.6               | -1.5         | 2.7          | 0.99847        |
| Ice Vibe 24h +Vibe vs Premier Water 15 °C        | 4.5               | 2.4          | 6.6          | 0.00000        |
| Ice Vibe 24h -Vibe vs Premier Water 15 °C        | 5.1               | 3.0          | 7.2          | 0.00000        |

| <b>INTERNAL TEMPERATURE RATE (°C/min)</b>   | <b>Difference</b> | <b>Lower</b> | <b>Upper</b> | <b>P-value</b> |
|---------------------------------------------|-------------------|--------------|--------------|----------------|
| Aerochill 16 °C vs Clay Covered 15 °C       | 0.1               | 0.0          | 0.1          | 0.29602        |
| Aerochill 16 °C vs Clay Uncovered 15 °C     | 0.1               | 0.0          | 0.1          | 0.02092        |
| Aerochill 16 °C vs Cryochaps Front 24h      | 0.3               | 0.3          | 0.4          | 0.00000        |
| Aerochill 16 °C vs Flask Only               | 0.1               | 0.1          | 0.2          | 0.00001        |
| Aerochill 16 °C vs Flask Only + Bandage     | 0.1               | 0.0          | 0.2          | 0.00006        |
| Aerochill 16 °C vs Green Ice Gel 15 °C      | 0.1               | 0.0          | 0.2          | 0.00102        |
| Aerochill 16 °C vs Hosing 15 °C             | 1.1               | 1.0          | 1.2          | 0.00000        |
| Aerochill 16 °C vs Hypacool                 | 0.0               | -0.1         | 0.1          | 0.99886        |
| Aerochill 16 °C vs Ice + Water 0 °C         | 1.0               | 0.9          | 1.0          | 0.00000        |
| Aerochill 16 °C vs Ice Cubes in a Boot      | 0.3               | 0.2          | 0.3          | 0.00000        |
| Aerochill 16 °C vs Ice Horse 24h            | 0.3               | 0.3          | 0.4          | 0.00000        |
| Aerochill 16 °C vs Ice Vibe 24h +Vibe       | 0.2               | 0.1          | 0.3          | 0.00000        |
| Aerochill 16 °C vs Ice Vibe 24h -Vibe       | 0.2               | 0.1          | 0.3          | 0.00000        |
| Aerochill 16 °C vs Premier Water 15 °C      | 0.0               | 0.0          | 0.1          | 0.80116        |
| Clay Covered 15 °C vs Clay Uncovered 15 °C  | 0.1               | 0.1          | 0.2          | 0.00001        |
| Clay Covered 15 °C vs Cryochaps Front 24h   | 0.4               | 0.3          | 0.5          | 0.00000        |
| Clay Covered 15 °C vs Flask Only            | 0.1               | 0.0          | 0.1          | 0.02587        |
| Clay Covered 15 °C vs Flask Only + Bandage  | 0.1               | 0.0          | 0.1          | 0.08620        |
| Clay Covered 15 °C vs Green Ice Gel 15 °C   | 0.2               | 0.1          | 0.2          | 0.00000        |
| Clay Covered 15 °C vs Hosing 15 °C          | 1.1               | 1.1          | 1.2          | 0.00000        |
| Clay Covered 15 °C vs Hypacool              | 0.1               | 0.0          | 0.1          | 0.03418        |
| Clay Covered 15 °C vs Ice + Water 0 °C      | 1.0               | 0.9          | 1.1          | 0.00000        |
| Clay Covered 15 °C vs Ice Cubes in a Boot   | 0.3               | 0.2          | 0.4          | 0.00000        |
| Clay Covered 15 °C vs Ice Horse 24h         | 0.4               | 0.3          | 0.5          | 0.00000        |
| Clay Covered 15 °C vs Ice Vibe 24h +Vibe    | 0.2               | 0.2          | 0.3          | 0.00000        |
| Clay Covered 15 °C vs Ice Vibe 24h -Vibe    | 0.3               | 0.2          | 0.3          | 0.00000        |
| Clay Covered 15 °C vs Premier Water 15 °C   | 0.1               | 0.0          | 0.2          | 0.00327        |
| Clay Uncovered 15 °C vs Cryochaps Front 24h | 0.3               | 0.2          | 0.3          | 0.00000        |
| Clay Uncovered 15 °C vs Flask Only          | 0.2               | 0.1          | 0.3          | 0.00000        |



| <b>INTERNAL TEMPERATURE RATE (°C/min)</b>    | <b>Difference</b> | <b>Lower</b> | <b>Upper</b> | <b>P-value</b> |
|----------------------------------------------|-------------------|--------------|--------------|----------------|
| Clay Uncovered 15 °C vs Flask Only + Bandage | 0.2               | 0.1          | 0.3          | 0.00000        |
| Clay Uncovered 15 °C vs Green Ice Gel 15 °C  | 0.0               | 0.0          | 0.1          | 0.99667        |
| Clay Uncovered 15 °C vs Hosing 15 °C         | 1.0               | 0.9          | 1.1          | 0.00000        |
| Clay Uncovered 15 °C vs Hypacool             | 0.1               | 0.0          | 0.1          | 0.20722        |
| Clay Uncovered 15 °C vs Ice + Water 0 °C     | 0.9               | 0.8          | 0.9          | 0.00000        |
| Clay Uncovered 15 °C vs Ice Cubes in a Boot  | 0.2               | 0.1          | 0.3          | 0.00000        |
| Clay Uncovered 15 °C vs Ice Horse 24h        | 0.3               | 0.2          | 0.3          | 0.00000        |
| Clay Uncovered 15 °C vs Ice Vibe 24h +Vibe   | 0.1               | 0.0          | 0.2          | 0.00025        |
| Clay Uncovered 15 °C vs Ice Vibe 24h -Vibe   | 0.1               | 0.1          | 0.2          | 0.00001        |
| Clay Uncovered 15 °C vs Premier Water 15 °C  | 0.0               | 0.0          | 0.1          | 0.73549        |
| Cryochaps Front 24h vs Flask Only            | 0.5               | 0.4          | 0.5          | 0.00000        |
| Cryochaps Front 24h vs Flask Only + Bandage  | 0.5               | 0.4          | 0.5          | 0.00000        |
| Cryochaps Front 24h vs Green Ice Gel 15 °C   | 0.2               | 0.2          | 0.3          | 0.00000        |
| Cryochaps Front 24h vs Hosing 15 °C          | 0.7               | 0.7          | 0.8          | 0.00000        |
| Cryochaps Front 24h vs Hypacool              | 0.3               | 0.2          | 0.4          | 0.00000        |
| Cryochaps Front 24h vs Ice + Water 0 °C      | 0.6               | 0.5          | 0.7          | 0.00000        |
| Cryochaps Front 24h vs Ice Cubes in a Boot   | 0.1               | 0.0          | 0.1          | 0.03661        |
| Cryochaps Front 24h vs Ice Horse 24h         | 0.0               | -0.1         | 0.1          | 1.00000        |
| Cryochaps Front 24h vs Ice Vibe 24h +Vibe    | 0.1               | 0.1          | 0.2          | 0.00000        |
| Cryochaps Front 24h vs Ice Vibe 24h -Vibe    | 0.1               | 0.1          | 0.2          | 0.00002        |
| Cryochaps Front 24h vs Premier Water 15 °C   | 0.3               | 0.2          | 0.4          | 0.00000        |
| Flask Only vs Flask Only + Bandage           | 0.0               | -0.1         | 0.1          | 1.00000        |
| Flask Only vs Green Ice Gel 15 °C            | 0.2               | 0.2          | 0.3          | 0.00000        |
| Flask Only vs Hosing 15 °C                   | 1.2               | 1.1          | 1.3          | 0.00000        |
| Flask Only vs Hypacool                       | 0.2               | 0.1          | 0.2          | 0.00000        |
| Flask Only vs Ice + Water 0 °C               | 1.1               | 1.0          | 1.2          | 0.00000        |
| Flask Only vs Ice Cubes in a Boot            | 0.4               | 0.3          | 0.5          | 0.00000        |
| Flask Only vs Ice Horse 24h                  | 0.5               | 0.4          | 0.5          | 0.00000        |
| Flask Only vs Ice Vibe 24h +Vibe             | 0.3               | 0.2          | 0.4          | 0.00000        |
| Flask Only vs Ice Vibe 24h -Vibe             | 0.3               | 0.3          | 0.4          | 0.00000        |
| Flask Only vs Premier Water 15 °C            | 0.2               | 0.1          | 0.2          | 0.00000        |
| Flask Only + Bandage vs Green Ice Gel 15 °C  | 0.2               | 0.1          | 0.3          | 0.00000        |
| Flask Only + Bandage vs Hosing 15 °C         | 1.2               | 1.1          | 1.3          | 0.00000        |
| Flask Only + Bandage vs Hypacool             | 0.1               | 0.1          | 0.2          | 0.00000        |
| Flask Only + Bandage vs Ice + Water 0 °C     | 1.1               | 1.0          | 1.1          | 0.00000        |
| Flask Only + Bandage vs Ice Cubes in a Boot  | 0.4               | 0.3          | 0.5          | 0.00000        |
| Flask Only + Bandage vs Ice Horse 24h        | 0.5               | 0.4          | 0.5          | 0.00000        |
| Flask Only + Bandage vs Ice Vibe 24h +Vibe   | 0.3               | 0.2          | 0.4          | 0.00000        |
| Flask Only + Bandage vs Ice Vibe 24h -Vibe   | 0.3               | 0.3          | 0.4          | 0.00000        |
| Flask Only + Bandage vs Premier Water 15 °C  | 0.2               | 0.1          | 0.2          | 0.00000        |
| Green Ice Gel 15 °C vs Hosing 15 °C          | 1.0               | 0.9          | 1.1          | 0.00000        |
| Green Ice Gel 15 °C vs Hypacool              | 0.1               | 0.0          | 0.2          | 0.01569        |
| Green Ice Gel 15 °C vs Ice + Water 0 °C      | 0.9               | 0.8          | 0.9          | 0.00000        |
| Green Ice Gel 15 °C vs Ice Cubes in a Boot   | 0.2               | 0.1          | 0.2          | 0.00000        |
| Green Ice Gel 15 °C vs Ice Horse 24h         | 0.2               | 0.2          | 0.3          | 0.00000        |
| Green Ice Gel 15 °C vs Ice Vibe 24h +Vibe    | 0.1               | 0.0          | 0.2          | 0.00556        |
| Green Ice Gel 15 °C vs Ice Vibe 24h -Vibe    | 0.1               | 0.0          | 0.2          | 0.00034        |
| Green Ice Gel 15 °C vs Premier Water 15 °C   | 0.1               | 0.0          | 0.1          | 0.13205        |
| Hosing 15 °C vs Hypacool                     | 1.1               | 1.0          | 1.1          | 0.00000        |
| Hosing 15 °C vs Ice + Water 0 °C             | 0.1               | 0.1          | 0.2          | 0.00001        |
| Hosing 15 °C vs Ice Cubes in a Boot          | 0.8               | 0.8          | 0.9          | 0.00000        |
| Hosing 15 °C vs Ice Horse 24h                | 0.7               | 0.7          | 0.8          | 0.00000        |

| <b>INTERNAL TEMPERATURE RATE (°C/min)</b>  | <b>Difference</b> | <b>Lower</b> | <b>Upper</b> | <b>P-value</b> |
|--------------------------------------------|-------------------|--------------|--------------|----------------|
| Hosing 15 °C vs Ice Vibe 24h +Vibe         | 0.9               | 0.8          | 1.0          | 0.00000        |
| Hosing 15 °C vs Ice Vibe 24h -Vibe         | 0.9               | 0.8          | 0.9          | 0.00000        |
| Hosing 15 °C vs Premier Water 15 °C        | 1.0               | 1.0          | 1.1          | 0.00000        |
| Hypacool vs Ice + Water 0 °C               | 0.9               | 0.9          | 1.0          | 0.00000        |
| Hypacool vs Ice Cubes in a Boot            | 0.2               | 0.2          | 0.3          | 0.00000        |
| Hypacool vs Ice Horse 24h                  | 0.3               | 0.2          | 0.4          | 0.00000        |
| Hypacool vs Ice Vibe 24h +Vibe             | 0.2               | 0.1          | 0.2          | 0.00000        |
| Hypacool vs Ice Vibe 24h -Vibe             | 0.2               | 0.1          | 0.3          | 0.00000        |
| Hypacool vs Premier Water 15 °C            | 0.0               | -0.1         | 0.1          | 0.99968        |
| Ice + Water 0 °C vs Ice Cubes in a Boot    | 0.7               | 0.6          | 0.8          | 0.00000        |
| Ice + Water 0 °C vs Ice Horse 24h          | 0.6               | 0.5          | 0.7          | 0.00000        |
| Ice + Water 0 °C vs Ice Vibe 24h +Vibe     | 0.8               | 0.7          | 0.8          | 0.00000        |
| Ice + Water 0 °C vs Ice Vibe 24h -Vibe     | 0.7               | 0.7          | 0.8          | 0.00000        |
| Ice + Water 0 °C vs Premier Water 15 °C    | 0.9               | 0.8          | 1.0          | 0.00000        |
| Ice Cubes in a Boot vs Ice Horse 24h       | 0.1               | 0.0          | 0.1          | 0.03190        |
| Ice Cubes in a Boot vs Ice Vibe 24h +Vibe  | 0.1               | 0.0          | 0.1          | 0.03190        |
| Ice Cubes in a Boot vs Ice Vibe 24h -Vibe  | 0.1               | 0.0          | 0.1          | 0.28198        |
| Ice Cubes in a Boot vs Premier Water 15 °C | 0.2               | 0.2          | 0.3          | 0.00000        |
| Ice Horse 24h vs Ice Vibe 24h +Vibe        | 0.1               | 0.1          | 0.2          | 0.00000        |
| Ice Horse 24h vs Ice Vibe 24h -Vibe        | 0.1               | 0.1          | 0.2          | 0.00002        |
| Ice Horse 24h vs Premier Water 15 °C       | 0.3               | 0.2          | 0.4          | 0.00000        |
| Ice Vibe 24h +Vibe vs Ice Vibe 24h -Vibe   | 0.0               | -0.1         | 0.1          | 0.99886        |
| Ice Vibe 24h +Vibe vs Premier Water 15 °C  | 0.2               | 0.1          | 0.2          | 0.00000        |
| Ice Vibe 24h -Vibe vs Premier Water 15 °C  | 0.2               | 0.1          | 0.2          | 0.00000        |

| <b>INTERNAL HEAT REMOVED (kJ)</b>          | <b>Difference</b> | <b>Lower</b> | <b>Upper</b> | <b>P-value</b> |
|--------------------------------------------|-------------------|--------------|--------------|----------------|
| Aerochill 16 °C vs Clay Covered 15 °C      | 6.8               | 1.2          | 12.4         | 0.00662        |
| Aerochill 16 °C vs Clay Uncovered 15 °C    | 9.8               | 4.2          | 15.4         | 0.00003        |
| Aerochill 16 °C vs Cryochaps Front 24h     | 42.0              | 36.4         | 47.6         | 0.00000        |
| Aerochill 16 °C vs Flask Only              | 15.4              | 9.8          | 21.0         | 0.00000        |
| Aerochill 16 °C vs Flask Only + Bandage    | 15.0              | 9.4          | 20.6         | 0.00000        |
| Aerochill 16 °C vs Green Ice Gel 15 °C     | 12.5              | 6.9          | 18.1         | 0.00000        |
| Aerochill 16 °C vs Hosing 15 °C            | 117.8             | 112.2        | 123.4        | 0.00000        |
| Aerochill 16 °C vs Hypacool                | 2.5               | -3.1         | 8.1          | 0.93070        |
| Aerochill 16 °C vs Ice + Water 0 °C        | 118.9             | 113.3        | 124.5        | 0.00000        |
| Aerochill 16 °C vs Ice Cubes in a Boot     | 36.4              | 30.8         | 42.0         | 0.00000        |
| Aerochill 16 °C vs Ice Horse 24h           | 35.4              | 29.8         | 41.0         | 0.00000        |
| Aerochill 16 °C vs Ice Vibe 24h +Vibe      | 23.5              | 17.9         | 29.1         | 0.00000        |
| Aerochill 16 °C vs Ice Vibe 24h -Vibe      | 26.0              | 20.4         | 31.6         | 0.00000        |
| Aerochill 16 °C vs Premier Water 15 °C     | 4.7               | -0.9         | 10.3         | 0.16999        |
| Clay Covered 15 °C vs Clay Uncovered 15 °C | 16.6              | 11.0         | 22.2         | 0.00000        |
| Clay Covered 15 °C vs Cryochaps Front 24h  | 48.8              | 43.2         | 54.4         | 0.00000        |
| Clay Covered 15 °C vs Flask Only           | 8.6               | 3.0          | 14.2         | 0.00027        |
| Clay Covered 15 °C vs Flask Only + Bandage | 8.2               | 2.6          | 13.8         | 0.00056        |
| Clay Covered 15 °C vs Green Ice Gel 15 °C  | 19.3              | 13.7         | 24.9         | 0.00000        |
| Clay Covered 15 °C vs Hosing 15 °C         | 124.6             | 119.0        | 130.2        | 0.00000        |
| Clay Covered 15 °C vs Hypacool             | 9.3               | 3.7          | 14.9         | 0.00008        |
| Clay Covered 15 °C vs Ice + Water 0 °C     | 125.7             | 120.1        | 131.3        | 0.00000        |
| Clay Covered 15 °C vs Ice Cubes in a Boot  | 43.2              | 37.6         | 48.8         | 0.00000        |
| Clay Covered 15 °C vs Ice Horse 24h        | 42.2              | 36.6         | 47.8         | 0.00000        |
| Clay Covered 15 °C vs Ice Vibe 24h +Vibe   | 30.3              | 24.7         | 35.9         | 0.00000        |
| Clay Covered 15 °C vs Ice Vibe 24h -Vibe   | 32.8              | 27.2         | 38.4         | 0.00000        |

| <b>INTERNAL HEAT REMOVED (kJ)</b>            | <b>Difference</b> | <b>Lower</b> | <b>Upper</b> | <b>P-value</b> |
|----------------------------------------------|-------------------|--------------|--------------|----------------|
| Clay Covered 15 °C vs Premier Water 15 °C    | 11.5              | 5.9          | 17.1         | 0.00000        |
| Clay Uncovered 15 °C vs Cryochaps Front 24h  | 32.2              | 26.6         | 37.8         | 0.00000        |
| Clay Uncovered 15 °C vs Flask Only           | 25.2              | 19.6         | 30.8         | 0.00000        |
| Clay Uncovered 15 °C vs Flask Only + Bandage | 24.8              | 19.2         | 30.4         | 0.00000        |
| Clay Uncovered 15 °C vs Green Ice Gel 15 °C  | 2.7               | -2.9         | 8.3          | 0.88501        |
| Clay Uncovered 15 °C vs Hosing 15 °C         | 108.0             | 102.4        | 113.6        | 0.00000        |
| Clay Uncovered 15 °C vs Hypacool             | 7.3               | 1.7          | 12.9         | 0.00277        |
| Clay Uncovered 15 °C vs Ice + Water 0 °C     | 109.1             | 103.5        | 114.7        | 0.00000        |
| Clay Uncovered 15 °C vs Ice Cubes in a Boot  | 26.6              | 21.0         | 32.2         | 0.00000        |
| Clay Uncovered 15 °C vs Ice Horse 24h        | 25.6              | 20.0         | 31.2         | 0.00000        |
| Clay Uncovered 15 °C vs Ice Vibe 24h +Vibe   | 13.7              | 8.1          | 19.3         | 0.00000        |
| Clay Uncovered 15 °C vs Ice Vibe 24h -Vibe   | 16.2              | 10.6         | 21.8         | 0.00000        |
| Clay Uncovered 15 °C vs Premier Water 15 °C  | 5.1               | -0.5         | 10.7         | 0.09905        |
| Cryochaps Front 24h vs Flask Only            | 57.4              | 51.8         | 63.0         | 0.00000        |
| Cryochaps Front 24h vs Flask Only + Bandage  | 57.0              | 51.4         | 62.6         | 0.00000        |
| Cryochaps Front 24h vs Green Ice Gel 15 °C   | 29.5              | 23.9         | 35.1         | 0.00000        |
| Cryochaps Front 24h vs Hosing 15 °C          | 75.8              | 70.2         | 81.4         | 0.00000        |
| Cryochaps Front 24h vs Hypacool              | 39.5              | 33.9         | 45.1         | 0.00000        |
| Cryochaps Front 24h vs Ice + Water 0 °C      | 76.9              | 71.3         | 82.5         | 0.00000        |
| Cryochaps Front 24h vs Ice Cubes in a Boot   | 5.6               | 0.0          | 11.2         | 0.04733        |
| Cryochaps Front 24h vs Ice Horse 24h         | 6.6               | 1.0          | 12.2         | 0.00932        |
| Cryochaps Front 24h vs Ice Vibe 24h +Vibe    | 18.5              | 12.9         | 24.1         | 0.00000        |
| Cryochaps Front 24h vs Ice Vibe 24h -Vibe    | 16.0              | 10.4         | 21.6         | 0.00000        |
| Cryochaps Front 24h vs Premier Water 15 °C   | 37.3              | 31.7         | 42.9         | 0.00000        |
| Flask Only vs Flask Only + Bandage           | 0.4               | -5.2         | 6.0          | 1.00000        |
| Flask Only vs Green Ice Gel 15 °C            | 27.9              | 22.3         | 33.5         | 0.00000        |
| Flask Only vs Hosing 15 °C                   | 133.2             | 127.6        | 138.8        | 0.00000        |
| Flask Only vs Hypacool                       | 17.9              | 12.3         | 23.5         | 0.00000        |
| Flask Only vs Ice + Water 0 °C               | 134.3             | 128.7        | 139.9        | 0.00000        |
| Flask Only vs Ice Cubes in a Boot            | 51.8              | 46.2         | 57.4         | 0.00000        |
| Flask Only vs Ice Horse 24h                  | 50.8              | 45.2         | 56.4         | 0.00000        |
| Flask Only vs Ice Vibe 24h +Vibe             | 38.9              | 33.3         | 44.5         | 0.00000        |
| Flask Only vs Ice Vibe 24h -Vibe             | 41.4              | 35.8         | 47.0         | 0.00000        |
| Flask Only vs Premier Water 15 °C            | 20.1              | 14.5         | 25.7         | 0.00000        |
| Flask Only + Bandage vs Green Ice Gel 15 °C  | 27.5              | 21.9         | 33.1         | 0.00000        |
| Flask Only + Bandage vs Hosing 15 °C         | 132.8             | 127.2        | 138.4        | 0.00000        |
| Flask Only + Bandage vs Hypacool             | 17.5              | 11.9         | 23.1         | 0.00000        |
| Flask Only + Bandage vs Ice + Water 0 °C     | 133.9             | 128.3        | 139.5        | 0.00000        |
| Flask Only + Bandage vs Ice Cubes in a Boot  | 51.4              | 45.8         | 57.0         | 0.00000        |
| Flask Only + Bandage vs Ice Horse 24h        | 50.4              | 44.8         | 56.0         | 0.00000        |
| Flask Only + Bandage vs Ice Vibe 24h +Vibe   | 38.5              | 32.9         | 44.1         | 0.00000        |
| Flask Only + Bandage vs Ice Vibe 24h -Vibe   | 41.0              | 35.4         | 46.6         | 0.00000        |
| Flask Only + Bandage vs Premier Water 15 °C  | 19.7              | 14.1         | 25.3         | 0.00000        |
| Green Ice Gel 15 °C vs Hosing 15 °C          | 105.3             | 99.7         | 110.9        | 0.00000        |
| Green Ice Gel 15 °C vs Hypacool              | 10.0              | 4.4          | 15.6         | 0.00002        |
| Green Ice Gel 15 °C vs Ice + Water 0 °C      | 106.4             | 100.8        | 112.0        | 0.00000        |
| Green Ice Gel 15 °C vs Ice Cubes in a Boot   | 23.9              | 18.3         | 29.5         | 0.00000        |
| Green Ice Gel 15 °C vs Ice Horse 24h         | 22.9              | 17.3         | 28.5         | 0.00000        |
| Green Ice Gel 15 °C vs Ice Vibe 24h +Vibe    | 11.0              | 5.4          | 16.6         | 0.00000        |
| Green Ice Gel 15 °C vs Ice Vibe 24h -Vibe    | 13.5              | 7.9          | 19.1         | 0.00000        |
| Green Ice Gel 15 °C vs Premier Water 15 °C   | 7.8               | 2.2          | 13.4         | 0.00114        |
| Hosing 15 °C vs Hypacool                     | 115.3             | 109.7        | 120.9        | 0.00000        |

| <b>INTERNAL HEAT REMOVED (kJ)</b>          | <b>Difference</b> | <b>Lower</b> | <b>Upper</b> | <b>P-value</b> |
|--------------------------------------------|-------------------|--------------|--------------|----------------|
| Hosing 15 °C vs Ice + Water 0 °C           | 1.1               | -4.5         | 6.7          | 0.99998        |
| Hosing 15 °C vs Ice Cubes in a Boot        | 81.4              | 75.8         | 87.0         | 0.00000        |
| Hosing 15 °C vs Ice Horse 24h              | 82.4              | 76.8         | 88.0         | 0.00000        |
| Hosing 15 °C vs Ice Vibe 24h +Vibe         | 94.3              | 88.7         | 99.9         | 0.00000        |
| Hosing 15 °C vs Ice Vibe 24h -Vibe         | 91.8              | 86.2         | 97.4         | 0.00000        |
| Hosing 15 °C vs Premier Water 15 °C        | 113.1             | 107.5        | 118.7        | 0.00000        |
| Hypacool vs Ice + Water 0 °C               | 116.4             | 110.8        | 122.0        | 0.00000        |
| Hypacool vs Ice Cubes in a Boot            | 33.9              | 28.3         | 39.5         | 0.00000        |
| Hypacool vs Ice Horse 24h                  | 32.9              | 27.3         | 38.5         | 0.00000        |
| Hypacool vs Ice Vibe 24h +Vibe             | 21.0              | 15.4         | 26.6         | 0.00000        |
| Hypacool vs Ice Vibe 24h -Vibe             | 23.5              | 17.9         | 29.1         | 0.00000        |
| Hypacool vs Premier Water 15 °C            | 2.2               | -3.4         | 7.8          | 0.97351        |
| Ice + Water 0 °C vs Ice Cubes in a Boot    | 82.5              | 76.9         | 88.1         | 0.00000        |
| Ice + Water 0 °C vs Ice Horse 24h          | 83.5              | 77.9         | 89.1         | 0.00000        |
| Ice + Water 0 °C vs Ice Vibe 24h +Vibe     | 95.4              | 89.8         | 101.0        | 0.00000        |
| Ice + Water 0 °C vs Ice Vibe 24h -Vibe     | 92.9              | 87.3         | 98.5         | 0.00000        |
| Ice + Water 0 °C vs Premier Water 15 °C    | 114.2             | 108.6        | 119.8        | 0.00000        |
| Ice Cubes in a Boot vs Ice Horse 24h       | 1.0               | -4.6         | 6.6          | 0.99999        |
| Ice Cubes in a Boot vs Ice Vibe 24h +Vibe  | 12.9              | 7.3          | 18.5         | 0.00000        |
| Ice Cubes in a Boot vs Ice Vibe 24h -Vibe  | 10.4              | 4.8          | 16.0         | 0.00001        |
| Ice Cubes in a Boot vs Premier Water 15 °C | 31.7              | 26.1         | 37.3         | 0.00000        |
| Ice Horse 24h vs Ice Vibe 24h +Vibe        | 11.9              | 6.3          | 17.5         | 0.00000        |
| Ice Horse 24h vs Ice Vibe 24h -Vibe        | 9.4               | 3.8          | 15.0         | 0.00006        |
| Ice Horse 24h vs Premier Water 15 °C       | 30.7              | 25.1         | 36.3         | 0.00000        |
| Ice Vibe 24h +Vibe vs Ice Vibe 24h -Vibe   | 2.5               | -3.1         | 8.1          | 0.93070        |
| Ice Vibe 24h +Vibe vs Premier Water 15 °C  | 18.8              | 13.2         | 24.4         | 0.00000        |
| Ice Vibe 24h -Vibe vs Premier Water 15 °C  | 21.3              | 15.7         | 26.9         | 0.00000        |
